# Supplementary material for: Generation of Trophoblast Organoids from Chorionic Villus Sampling
Source: MDPI journal article supplement (doi:10.3390/organoids3010005), 2024-03-05
Supplement: s1 [file s1]

| gene    | avg_log2FC           | pct.1 | pct.2 | p_val_adj | delta                | diffexpressed |
|---------|----------------------|-------|-------|-----------|----------------------|---------------|
| PRKCZ   | -0.762627885010626   | 0.073 | 0.497 |           | 0 -0.424             | UP in CVS-TO  |
| RPL22   | 0.857206028902466    | 0.984 | 0.786 |           | 0 0.198              | UP in TSC-TO  |
| MINOS1  | -0.370863436656019   | 0     | 0.253 |           | 0 -0.253             | NO            |
| RPL11   | 0.980425126131047    | 0.997 | 0.968 |           | 0 0.029              | UP in TSC-TO  |
| CLIC4   | -0.42240092817123    | 0.116 | 0.352 |           | 0 -0.236             | NO            |
| ATPIF1  | -0.536415979401781   | 0     | 0.349 |           | 0 -0.349             | NO            |
| TINAGL1 | -0.232899643610707   | 0.164 | 0.309 |           | 0 -0.145             | NO            |
| EVA1B   | -0.562213774618054   | 0.143 | 0.439 |           | 0 -0.296             | NO            |
| SLC2A1  | -0.510307806246669   | 0.253 | 0.504 |           | 0 -0.251             | NO            |
| ATP6V0B | -0.377827850563677   | 0.184 | 0.405 |           | 0 -0.221             | NO            |
| RPS8    | 0.922075908888838    | 0.995 | 0.971 |           | 0 0.024              | UP in TSC-TO  |
| UQCRH   | 0.336237210693271    | 0.764 | 0.6   |           | 0 0.164              | NO            |
| GNG12   | -0.285574578995898   | 0.098 | 0.291 |           | 0 -0.193             | NO            |
| LMO4    | 0.333041472435997    | 0.317 | 0.147 |           | 0 0.17               | NO            |
| RPL5    | 10.604.319.302.877   | 0.994 | 0.878 |           | 0 0.116              | UP in TSC-TO  |
| MAN1A2  | -0.519850793286559   | 0.07  | 0.344 |           | 0 -0.274             | NO            |
| HSD3B1  | -0.598472153347045   | 0.067 | 0.354 |           | 0 -0.287             | NO            |
| S100A10 | 0.568162262240227    | 0.681 | 0.477 |           | 0 0.204              | NO            |
| S100A11 | 0.630964460599558    | 0.987 | 0.912 |           | 0 0.075              | UP in TSC-TO  |
| S100A9  | -0.818389373867304   | 0.059 | 0.45  |           | 0 -0.391             | UP in CVS-TO  |
| RPS27   | 0.350376930584624    | 0.989 | 0.962 |           | 0 0.027              | NO            |
| GLUL    | -0.875561298423889   | 0.048 | 0.429 |           | 0 -0.381             | UP in CVS-TO  |
| CSRP1   | -0.337086280115112   | 0.077 | 0.277 |           | 0 -0.2               | NO            |
| SNRPE   | 0.4172959973681      | 0.57  | 0.362 |           | 0 0.208              | NO            |
| KISS1   | -257.306.616.707.949 | 0.037 | 0.767 |           | 0 -0.73              | UP in CVS-TO  |
| CD46    | -0.370050564402909   | 0.141 | 0.366 |           | 0 -0.225             | NO            |
| NENF    | 0.321260134657634    | 0.39  | 0.215 |           | 0 0.175              | NO            |
| H3F3A   | 0.432598055436214    | 0.76  | 0.552 |           | 0 0.208              | NO            |
| ARF1    | -0.325506512228825   | 0.249 | 0.454 |           | 0 -0.205             | NO            |
| ADI1    | -0.27421339341992    | 0.209 | 0.388 |           | 0 -0.179             | NO            |
| RPS7    | 0.825234555242649    | 0.993 | 0.925 |           | 0 0.0679999999999999 | UP in TSC-TO  |
| SDC1    | -107.831.885.307.439 | 0.026 | 0.488 |           | 0 -0.462             | UP in CVS-TO  |
| PPP1CB  | -0.696957050122885   | 0.189 | 0.556 |           | 0 -0.367             | UP in CVS-TO  |
| EPAS1   | -0.375525018515247   | 0.099 | 0.325 |           | 0 -0.226             | NO            |
| MCFD2   | -0.326906714786389   | 0.099 | 0.299 |           | 0 -0.2               | NO            |
| EPCAM   | 0.313284975705806    | 0.251 | 0.064 |           | 0 0.187              | NO            |
| RPS27A  | 10.284.973.878.797   | 0.996 | 0.959 |           | 0 0.037              | UP in TSC-TO  |
| RAB1A   | -0.232427895263769   | 0.143 | 0.304 |           | 0 -0.161             | NO            |
| TMSB10  | 110.352.587.235.711  | 0.97  | 0.748 |           | 0 0.222              | UP in TSC-TO  |
| RPL31   | 130.696.505.414.289  | 0.908 | 0.408 |           | 0 0.5                | UP in TSC-TO  |
| MZT2A   | 0.302006981950519    | 0.32  | 0.141 |           | 0 0.179              | NO            |
| RBMS1   | -0.257831857500733   | 0.09  | 0.261 |           | 0 -0.171             | NO            |
| ATP5G3  | -128.174.336.773.411 | 0     | 0.661 |           | 0 -0.661             | UP in CVS-TO  |
| TFPI    | -0.46883327038939    | 0.241 | 0.409 |           | 0 -0.168             | NO            |
| SLC40A1 | -0.332060331399142   | 0.127 | 0.344 |           | 0 -0.217             | NO            |
| BZW1    | -0.278559339422744   | 0.132 | 0.322 |           | 0 -0.19              | NO            |
| EEF1B2  | 0.75547327280131     | 0.97  | 0.708 |           | 0 0.262              | UP in TSC-TO  |
| RPL37A  | 137.754.715.525.219  | 0.988 | 0.775 |           | 0 0.213              | UP in TSC-TO  |
| CHPF    | -0.299838640316987   | 0.06  | 0.259 |           | 0 -0.199             | NO            |
| PTMA    | 0.414749334834117    | 0.972 | 0.848 |           | 0 0.124              | NO            |
| HDLBP   | -0.357467625537208   | 0.176 | 0.403 |           | 0 -0.227             | NO            |
| RPL32   | 0.713063748792794    | 0.994 | 0.973 |           | 0 0.021              | UP in TSC-TO  |
| LSM3    | 0.308172388891982    | 0.391 | 0.22  |           | 0 0.171              | NO            |
| RPL15   | 101.942.993.214.669  | 0.995 | 0.923 |           | 0 0.072              | UP in TSC-TO  |

|           |                      |       |       |   |                    |              |
|-----------|----------------------|-------|-------|---|--------------------|--------------|
| STT3B     | -0.306358099995304   | 0.078 | 0.273 | 0 | -0.195             | NO           |
| GOLGA4    | -0.266826088558252   | 0.163 | 0.322 | 0 | -0.159             | NO           |
| RPSA      | 0.753006128298542    | 0.987 | 0.831 | 0 | 0.156              | UP in TSC-TO |
| RPL14     | 0.891019762922886    | 0.993 | 0.916 | 0 | 0.077              | UP in TSC-TO |
| UQCRC1    | -0.275754623153705   | 0.184 | 0.366 | 0 | -0.182             | NO           |
| GPX1      | -0.855630874634988   | 0     | 0.501 | 0 | -0.501             | UP in CVS-TO |
| MANF      | -0.44785022733126    | 0.116 | 0.366 | 0 | -0.25              | NO           |
| RPL29     | 0.744294112854763    | 0.991 | 0.917 | 0 | 0.074              | UP in TSC-TO |
| ARF4      | -0.289424865190926   | 0.165 | 0.365 | 0 | -0.2               | NO           |
| RYBP      | -0.556997438797022   | 0.089 | 0.372 | 0 | -0.283             | NO           |
| VGLL3     | -0.805069551816965   | 0.031 | 0.402 | 0 | -0.371             | UP in CVS-TO |
| MTRNR2L12 | -175.866.716.456.781 | 0.003 | 0.761 | 0 | -0.758             | UP in CVS-TO |
| RPL24     | 0.749745499428752    | 0.991 | 0.871 | 0 | 0.12               | UP in TSC-TO |
| SEC61A1   | -0.416314153958187   | 0.047 | 0.316 | 0 | -0.269             | NO           |
| GATA2     | -0.344631704372885   | 0.131 | 0.338 | 0 | -0.207             | NO           |
| RAB7A     | -0.253431920319873   | 0.108 | 0.283 | 0 | -0.175             | NO           |
| SELT      | -0.398022749347764   | 0     | 0.264 | 0 | -0.264             | NO           |
| SIAH2     | -0.320558443152052   | 0.089 | 0.3   | 0 | -0.211             | NO           |
| AP2M1     | -0.457518276253635   | 0.192 | 0.474 | 0 | -0.282             | NO           |
| EIF4G1    | -0.400882222555676   | 0.082 | 0.344 | 0 | -0.262             | NO           |
| EIF4A2    | -0.210405864286336   | 0.118 | 0.271 | 0 | -0.153             | NO           |
| RPL35A    | 0.83445114573124     | 0.987 | 0.83  | 0 | 0.157              | UP in TSC-TO |
| ATP5I     | -0.62414929082975    | 0     | 0.389 | 0 | -0.389             | UP in CVS-TO |
| S100P     | -0.538060260969536   | 0.409 | 0.624 | 0 | -0.215             | NO           |
| RPL9      | 0.85112918074175     | 0.993 | 0.893 | 0 | 0.1                | UP in TSC-TO |
| HOPX      | -0.386972999073493   | 0.03  | 0.257 | 0 | -0.227             | NO           |
| RPL34     | 100.257.858.300.725  | 0.993 | 0.916 | 0 | 0.077              | UP in TSC-TO |
| RPS3A     | 107.125.887.410.169  | 0.996 | 0.942 | 0 | 0.054              | UP in TSC-TO |
| MSMO1     | -0.206009959758706   | 0.127 | 0.264 | 0 | -0.137             | NO           |
| SPCS3     | -0.295322694779122   | 0.154 | 0.328 | 0 | -0.174             | NO           |
| BASP1     | -0.451217491588731   | 0.409 | 0.557 | 0 | -0.148             | NO           |
| LIFR      | -0.546501004640763   | 0.057 | 0.316 | 0 | -0.259             | NO           |
| DAB2      | -100.848.334.399.629 | 0.139 | 0.547 | 0 | -0.408             | UP in CVS-TO |
| RPL37     | 113.500.645.235.313  | 0.994 | 0.909 | 0 | 0.085              | UP in TSC-TO |
| BTF3      | 0.561428204953492    | 0.921 | 0.634 | 0 | 0.287              | NO           |
| HEXB      | -0.383218603018472   | 0.109 | 0.328 | 0 | -0.219             | NO           |
| RPS23     | 0.830424063593811    | 0.995 | 0.965 | 0 | 0.03               | UP in TSC-TO |
| RASA1     | -0.503818160340597   | 0.048 | 0.368 | 0 | -0.32              | NO           |
| GLRX      | -0.815593259160367   | 0.011 | 0.396 | 0 | -0.385             | UP in CVS-TO |
| HINT1     | 0.370873850512629    | 0.638 | 0.462 | 0 | 0.176              | NO           |
| UQCRCQ    | -0.307943299291028   | 0.331 | 0.528 | 0 | -0.197             | NO           |
| UBE2B     | -0.242355774680049   | 0.166 | 0.331 | 0 | -0.165             | NO           |
| ETF1      | -0.297894181375397   | 0.112 | 0.314 | 0 | -0.202             | NO           |
| RPS14     | 131.318.900.545.902  | 0.995 | 0.937 | 0 | 0.0579999999999999 | UP in TSC-TO |
| GM2A      | -0.430686312888758   | 0.059 | 0.3   | 0 | -0.241             | NO           |
| LMAN2     | -0.239756159787553   | 0.176 | 0.334 | 0 | -0.158             | NO           |
| TMED9     | -0.594296469501924   | 0.247 | 0.54  | 0 | -0.293             | NO           |
| HNRNPH1   | -0.286128016977794   | 0.152 | 0.311 | 0 | -0.159             | NO           |
| CANX      | -0.654001983787715   | 0.213 | 0.532 | 0 | -0.319             | UP in CVS-TO |
| SQSTM1    | -0.900229044353462   | 0.236 | 0.662 | 0 | -0.426             | UP in CVS-TO |
| GNB2L1    | -206.335.177.715.146 | 0     | 0.873 | 0 | -0.873             | UP in CVS-TO |
| SSR1      | -0.246171257998535   | 0.097 | 0.257 | 0 | -0.16              | NO           |
| HIST1H4C  | 0.615632343262616    | 0.318 | 0.103 | 0 | 0.215              | UP in TSC-TO |
| CLIC1     | 0.470099160994228    | 0.55  | 0.338 | 0 | 0.212              | NO           |
| RPS18     | 0.95327531016753     | 0.997 | 0.979 | 0 | 0.018              | UP in TSC-TO |

|          |                      |       |       |   |        |              |
|----------|----------------------|-------|-------|---|--------|--------------|
| RPS10    | 186.171.569.198.487  | 0.991 | 0.586 | 0 | 0.405  | UP in TSC-TO |
| RPL10A   | 0.823487021099042    | 0.987 | 0.799 | 0 | 0.188  | UP in TSC-TO |
| CDKN1A   | -0.379845550398004   | 0.053 | 0.272 | 0 | -0.219 | NO           |
| HSP90AB1 | 0.503505842661889    | 0.92  | 0.706 | 0 | 0.214  | NO           |
| PTP4A1   | -0.422848465371739   | 0     | 0.278 | 0 | -0.278 | NO           |
| EEF1A1   | 0.272947473365307    | 0.998 | 0.995 | 0 | 0.003  | NO           |
| FAM46A   | -0.440286203977739   | 0     | 0.254 | 0 | -0.254 | NO           |
| CGA      | -199.949.830.877.878 | 0.748 | 1     | 0 | -0.252 | UP in CVS-TO |
| AIM1     | -0.93010421052754    | 0     | 0.524 | 0 | -0.524 | UP in CVS-TO |
| CD24     | -0.36638556972243    | 0.259 | 0.432 | 0 | -0.173 | NO           |
| CD164    | -0.399891716669624   | 0.16  | 0.374 | 0 | -0.214 | NO           |
| RPS12    | 0.870552409370675    | 0.996 | 0.983 | 0 | 0.013  | UP in TSC-TO |
| SGK1     | -0.371425497378426   | 0.067 | 0.297 | 0 | -0.23  | NO           |
| EZR      | -0.525673751905816   | 0.376 | 0.644 | 0 | -0.268 | NO           |
| EIF3B    | -0.282558482309911   | 0.157 | 0.346 | 0 | -0.189 | NO           |
| ACTB     | -0.377414959409118   | 0.741 | 0.835 | 0 | -0.094 | NO           |
| BZW2     | -0.243549655126651   | 0.217 | 0.375 | 0 | -0.158 | NO           |
| TOMM7    | 0.607627620139011    | 0.608 | 0.319 | 0 | 0.289  | UP in TSC-TO |
| PSMA2    | 0.392845919282134    | 0.388 | 0.155 | 0 | 0.233  | NO           |
| EGFR     | -0.384398640394091   | 0.135 | 0.352 | 0 | -0.217 | NO           |
| EIF4H    | -0.240639383739633   | 0.193 | 0.361 | 0 | -0.168 | NO           |
| HSPB1    | -0.986986804722427   | 0.388 | 0.736 | 0 | -0.348 | UP in CVS-TO |
| ERVW-1   | -0.665957951361084   | 0.125 | 0.485 | 0 | -0.36  | UP in CVS-TO |
| TFPI2    | -117.192.788.012.841 | 0.053 | 0.468 | 0 | -0.415 | UP in CVS-TO |
| PEG10    | -0.897267998317378   | 0.842 | 0.961 | 0 | -0.119 | UP in CVS-TO |
| SHFM1    | -0.70518418833872    | 0     | 0.45  | 0 | -0.45  | UP in CVS-TO |
| ATP5J2   | -0.75027787448876    | 0     | 0.454 | 0 | -0.454 | UP in CVS-TO |
| SERPINE1 | -0.291122969063169   | 0.095 | 0.27  | 0 | -0.175 | NO           |
| SND1     | -0.209304136545358   | 0.125 | 0.268 | 0 | -0.143 | NO           |
| LEP      | -0.499879079602436   | 0.025 | 0.266 | 0 | -0.241 | NO           |
| CALU     | -0.402894414479341   | 0.118 | 0.333 | 0 | -0.215 | NO           |
| AKR1B1   | -0.332814385617881   | 0.671 | 0.818 | 0 | -0.147 | NO           |
| TCAF1    | -0.437180021102415   | 0.117 | 0.377 | 0 | -0.26  | NO           |
| PDIA4    | -0.272275110436224   | 0.107 | 0.285 | 0 | -0.178 | NO           |
| INSIG1   | -0.531559925324457   | 0.143 | 0.445 | 0 | -0.302 | NO           |
| STS      | -0.46830836450364    | 0.068 | 0.322 | 0 | -0.254 | NO           |
| SAT1     | -118.695.672.944.003 | 0.548 | 0.959 | 0 | -0.411 | UP in CVS-TO |
| DDX3X    | -0.248210339746064   | 0.154 | 0.326 | 0 | -0.172 | NO           |
| XAGE3    | -0.0910779630025493  | 0.374 | 0.638 | 0 | -0.264 | NO           |
| FOXO4    | -0.413296985001237   | 0.053 | 0.318 | 0 | -0.265 | NO           |
| RPS4X    | 165.286.804.342.542  | 0.997 | 0.917 | 0 | 0.08   | UP in TSC-TO |
| RPL36A   | 191.545.023.870.943  | 0.972 | 0.271 | 0 | 0.701  | UP in TSC-TO |
| WBP5     | -0.527615885611181   | 0     | 0.342 | 0 | -0.342 | NO           |
| NGFRAP1  | -0.671750673895929   | 0     | 0.394 | 0 | -0.394 | UP in CVS-TO |
| MORF4L2  | -0.250845909459348   | 0.185 | 0.361 | 0 | -0.176 | NO           |
| RPL39    | 0.654651617228734    | 0.992 | 0.952 | 0 | 0.04   | UP in TSC-TO |
| MBNL3    | -0.509012343244728   | 0.205 | 0.476 | 0 | -0.271 | NO           |
| RPL10    | 10.499.265.316.283   | 0.996 | 0.969 | 0 | 0.027  | UP in TSC-TO |
| ATP6AP1  | -0.302078222344946   | 0.059 | 0.256 | 0 | -0.197 | NO           |
| TDRP     | -0.223688839681538   | 0.15  | 0.309 | 0 | -0.159 | NO           |
| CTSB     | -0.761101352624651   | 0.242 | 0.536 | 0 | -0.294 | UP in CVS-TO |
| TUSC3    | -0.366269668150862   | 0.159 | 0.363 | 0 | -0.204 | NO           |
| PDLIM2   | -0.241879038601396   | 0.109 | 0.277 | 0 | -0.168 | NO           |
| RPS20    | 133.963.771.957.903  | 0.902 | 0.418 | 0 | 0.484  | UP in TSC-TO |
| SDCBP    | -0.300909641432439   | 0.211 | 0.403 | 0 | -0.192 | NO           |

|          |                      |       |       |   |                    |              |
|----------|----------------------|-------|-------|---|--------------------|--------------|
| GGH      | -0.459525137241541   | 0.11  | 0.372 | 0 | -0.262             | NO           |
| RPL7     | 125.592.309.713.849  | 0.988 | 0.748 | 0 | 0.24               | UP in TSC-TO |
| TCEB1    | -0.406985472567596   | 0     | 0.276 | 0 | -0.276             | NO           |
| RPL30    | 0.948986708309813    | 0.993 | 0.912 | 0 | 0.081              | UP in TSC-TO |
| YWHAZ    | -0.267433210032108   | 0.261 | 0.435 | 0 | -0.174             | NO           |
| AZIN1    | -0.313079694670768   | 0.097 | 0.31  | 0 | -0.213             | NO           |
| PSCA     | -0.406276899810987   | 0.02  | 0.257 | 0 | -0.237             | NO           |
| RPL8     | 0.752972211278545    | 0.996 | 0.969 | 0 | 0.027              | UP in TSC-TO |
| INSL4    | -0.260454828228367   | 0.084 | 0.252 | 0 | -0.168             | NO           |
| RPS6     | 0.740038128916331    | 0.994 | 0.938 | 0 | 0.056              | UP in TSC-TO |
| VCP      | -0.36250583935177    | 0.173 | 0.409 | 0 | -0.236             | NO           |
| TOMM5    | 0.37729044721288     | 0.318 | 0.093 | 0 | 0.225              | NO           |
| CTSL     | -0.488816463876225   | 0.277 | 0.543 | 0 | -0.266             | NO           |
| GADD45G  | -0.282792305228791   | 0.076 | 0.258 | 0 | -0.182             | NO           |
| TXN      | 0.4801847791213      | 0.57  | 0.355 | 0 | 0.215              | NO           |
| HSPA5    | -0.584612574549224   | 0.395 | 0.62  | 0 | -0.225             | NO           |
| RPL12    | 142.375.573.862.912  | 0.994 | 0.923 | 0 | 0.071              | UP in TSC-TO |
| FAM129B  | -0.567007684158765   | 0     | 0.354 | 0 | -0.354             | NO           |
| ENG      | -0.451274301188266   | 0.095 | 0.33  | 0 | -0.235             | NO           |
| SH3GLB2  | -0.250890373470926   | 0.087 | 0.259 | 0 | -0.172             | NO           |
| RPL7A    | 10.190.699.734.988   | 0.995 | 0.956 | 0 | 0.039              | UP in TSC-TO |
| SURF4    | -0.36886526469679    | 0.098 | 0.328 | 0 | -0.23              | NO           |
| TMEM141  | 0.470107582300106    | 0.363 | 0.12  | 0 | 0.243              | NO           |
| EDF1     | -0.665177999244792   | 0.466 | 0.756 | 0 | -0.29              | UP in CVS-TO |
| RPLP2    | 0.770772547007397    | 0.992 | 0.935 | 0 | 0.0569999999999999 | UP in TSC-TO |
| CTSD     | -0.399769578858129   | 0.083 | 0.322 | 0 | -0.239             | NO           |
| IGF2     | -197.543.941.834.358 | 0.02  | 0.875 | 0 | -0.855             | UP in CVS-TO |
| PHLDA2   | -0.544106489594675   | 0.699 | 0.883 | 0 | -0.184             | NO           |
| RPL27A   | 0.838532566449233    | 0.954 | 0.797 | 0 | 0.157              | UP in TSC-TO |
| ADM      | -0.447853584358629   | 0.039 | 0.286 | 0 | -0.247             | NO           |
| MTRNR2L8 | -0.80162012273137    | 0     | 0.45  | 0 | -0.45              | UP in CVS-TO |
| EIF4G2   | -0.804739702797198   | 0.239 | 0.651 | 0 | -0.412             | UP in CVS-TO |
| RPS13    | 0.756550726309316    | 0.993 | 0.937 | 0 | 0.0559999999999999 | UP in TSC-TO |
| LDHA     | 0.79105931988895     | 0.801 | 0.481 | 0 | 0.32               | UP in TSC-TO |
| CD59     | -0.650774079155499   | 0.235 | 0.505 | 0 | -0.27              | UP in CVS-TO |
| DDB1     | -0.298334990237251   | 0.151 | 0.352 | 0 | -0.201             | NO           |
| FTH1     | 137.655.749.651.376  | 0.98  | 0.885 | 0 | 0.095              | UP in TSC-TO |
| EEF1G    | 185.369.104.383.197  | 0.905 | 0.002 | 0 | 0.903              | UP in TSC-TO |
| PLA2G16  | -0.3901427994287     | 0     | 0.259 | 0 | -0.259             | NO           |
| STIP1    | -0.238390505791492   | 0.095 | 0.262 | 0 | -0.167             | NO           |
| FKBP2    | -124.521.181.258.455 | 0.008 | 0.604 | 0 | -0.596             | UP in CVS-TO |
| FAU      | 0.432125561086443    | 0.971 | 0.81  | 0 | 0.161              | NO           |
| MALAT1   | 137.020.921.540.747  | 0.924 | 0.746 | 0 | 0.178              | UP in TSC-TO |
| CFL1     | -0.612265200925273   | 0.5   | 0.765 | 0 | -0.265             | UP in CVS-TO |
| STARD10  | -0.407417079854734   | 0.241 | 0.493 | 0 | -0.252             | NO           |
| RPS3     | 101.824.669.711.409  | 0.996 | 0.971 | 0 | 0.025              | UP in TSC-TO |
| FDX1     | -0.746890687303725   | 0.309 | 0.596 | 0 | -0.287             | UP in CVS-TO |
| ATP5L    | -112.588.917.121.242 | 0     | 0.625 | 0 | -0.625             | UP in CVS-TO |
| RPS25    | 0.890027040384766    | 0.986 | 0.797 | 0 | 0.189              | UP in TSC-TO |
| IDI1     | -0.254036041099753   | 0.133 | 0.301 | 0 | -0.168             | NO           |
| ATP5C1   | -0.596615997370802   | 0     | 0.374 | 0 | -0.374             | NO           |
| KIF5B    | -0.249356805046134   | 0.153 | 0.307 | 0 | -0.154             | NO           |
| C10orf54 | -0.472329645368907   | 0     | 0.293 | 0 | -0.293             | NO           |
| RPS24    | 0.942011461832938    | 0.996 | 0.973 | 0 | 0.023              | UP in TSC-TO |
| SCD      | -0.408538188094693   | 0.202 | 0.448 | 0 | -0.246             | NO           |

|           |                      |       |       |   |                    |              |
|-----------|----------------------|-------|-------|---|--------------------|--------------|
| USMG5     | -0.664626784886452   | 0     | 0.421 | 0 | -0.421             | UP in CVS-TO |
| GSTO1     | 0.34368579810309     | 0.459 | 0.311 | 0 | 0.148              | NO           |
| DUSP5     | -0.579366333098921   | 0.212 | 0.509 | 0 | -0.297             | NO           |
| ADAM12    | -0.761976412980475   | 0.011 | 0.354 | 0 | -0.343             | UP in CVS-TO |
| BNIP3     | 0.393031640640911    | 0.377 | 0.227 | 0 | 0.15               | NO           |
| FKBP4     | -0.200975972080156   | 0.139 | 0.284 | 0 | -0.145             | NO           |
| GAPDH     | 0.824670299307966    | 0.979 | 0.937 | 0 | 0.0419999999999999 | UP in TSC-TO |
| MLF2      | -0.249648648973504   | 0.184 | 0.361 | 0 | -0.177             | NO           |
| TPI1      | 0.404953279117672    | 0.771 | 0.614 | 0 | 0.157              | NO           |
| SLC38A1   | -0.587812498807996   | 0.121 | 0.417 | 0 | -0.296             | NO           |
| SLC38A2   | -0.389202583879045   | 0.055 | 0.288 | 0 | -0.233             | NO           |
| KRT18     | 0.672638175964417    | 0.979 | 0.969 | 0 | 0.01               | UP in TSC-TO |
| PCBP2     | -0.343168884544175   | 0.167 | 0.395 | 0 | -0.228             | NO           |
| ATP5G2    | -0.623522861568136   | 0     | 0.395 | 0 | -0.395             | UP in CVS-TO |
| CD63      | -121.280.393.633.973 | 0.526 | 0.823 | 0 | -0.297             | UP in CVS-TO |
| RPL41     | 145.337.057.854.171  | 0.996 | 0.923 | 0 | 0.073              | UP in TSC-TO |
| ATP5B     | -102.285.375.982.726 | 0     | 0.604 | 0 | -0.604             | UP in CVS-TO |
| NACA      | 0.677706320905593    | 0.988 | 0.822 | 0 | 0.166              | UP in TSC-TO |
| NUDT4     | -0.21909247881638    | 0.122 | 0.277 | 0 | -0.155             | NO           |
| HSP90B1   | -0.627721337593393   | 0.462 | 0.665 | 0 | -0.203             | UP in CVS-TO |
| TXNRD1    | -0.320879450526865   | 0.053 | 0.251 | 0 | -0.198             | NO           |
| RPL6      | 0.777270950794794    | 0.992 | 0.889 | 0 | 0.103              | UP in TSC-TO |
| TBX3      | -0.515408880398236   | 0.064 | 0.358 | 0 | -0.294             | NO           |
| PEBP1     | 0.401167778710661    | 0.752 | 0.538 | 0 | 0.214              | NO           |
| HSPB8     | -0.902977924220935   | 0.113 | 0.539 | 0 | -0.426             | UP in CVS-TO |
| RPLP0     | 0.715976232744957    | 0.994 | 0.888 | 0 | 0.106              | UP in TSC-TO |
| UBC       | -0.368262763539732   | 0.448 | 0.688 | 0 | -0.24              | NO           |
| RPL21     | 134.766.579.438.598  | 0.992 | 0.812 | 0 | 0.18               | UP in TSC-TO |
| HMGB1     | 0.612865908971239    | 0.661 | 0.383 | 0 | 0.278              | UP in TSC-TO |
| TPT1      | 0.504951437745342    | 0.996 | 0.979 | 0 | 0.017              | NO           |
| LAMP1     | -0.437432506313915   | 0.095 | 0.364 | 0 | -0.269             | NO           |
| PSMA6     | 0.512949874293389    | 0.351 | 0.039 | 0 | 0.312              | NO           |
| RPS29     | 0.71392353885554     | 0.952 | 0.821 | 0 | 0.131              | UP in TSC-TO |
| C14orf166 | -0.424026282506099   | 0     | 0.289 | 0 | -0.289             | NO           |
| LGALS3    | 0.680628697007019    | 0.505 | 0.187 | 0 | 0.318              | UP in TSC-TO |
| SRSF5     | -0.233910909542587   | 0.222 | 0.385 | 0 | -0.163             | NO           |
| PGF       | -115.349.991.728.077 | 0.212 | 0.636 | 0 | -0.424             | UP in CVS-TO |
| TMED10    | -0.277934792240674   | 0.187 | 0.336 | 0 | -0.149             | NO           |
| CALM1     | 0.308043343728097    | 0.643 | 0.507 | 0 | 0.136              | NO           |
| C14orf2   | -0.93763764333945    | 0     | 0.566 | 0 | -0.566             | UP in CVS-TO |
| SPINT1    | -0.286593725861897   | 0.229 | 0.405 | 0 | -0.176             | NO           |
| PDIA3     | -0.591691048791821   | 0.385 | 0.618 | 0 | -0.233             | NO           |
| B2M       | 0.696510767950314    | 0.734 | 0.431 | 0 | 0.303              | UP in TSC-TO |
| SECISBP2L | -0.43525495379649    | 0.032 | 0.293 | 0 | -0.261             | NO           |
| CYP19A1   | -164.058.958.415.173 | 0.081 | 0.653 | 0 | -0.572             | UP in CVS-TO |
| TPM1      | 0.617410666192914    | 0.311 | 0.051 | 0 | 0.26               | UP in TSC-TO |
| PPIB      | -0.884302668023043   | 0.532 | 0.794 | 0 | -0.262             | UP in CVS-TO |
| RPLP1     | 111.660.662.050.186  | 0.997 | 0.983 | 0 | 0.014              | UP in TSC-TO |
| CYP11A1   | -0.818715163287004   | 0.216 | 0.605 | 0 | -0.389             | UP in CVS-TO |
| MESDC2    | -0.590451370168131   | 0     | 0.348 | 0 | -0.348             | NO           |
| RPS17     | 0.905091776540862    | 0.927 | 0.646 | 0 | 0.281              | UP in TSC-TO |
| FURIN     | -0.477304967359102   | 0.071 | 0.356 | 0 | -0.285             | NO           |
| RPS2      | 149.289.033.911.287  | 0.997 | 0.947 | 0 | 0.05               | UP in TSC-TO |
| ATP6V0C   | 0.509203864947413    | 0.311 | 0.005 | 0 | 0.306              | NO           |
| TCEB2     | -0.795320014663361   | 0     | 0.501 | 0 | -0.501             | UP in CVS-TO |

|           |                      |       |       |   |        |              |
|-----------|----------------------|-------|-------|---|--------|--------------|
| RPS15A    | 0.993138919286013    | 0.992 | 0.905 | 0 | 0.087  | UP in TSC-TO |
| LCMT1-AS2 | -0.409965511684307   | 0.065 | 0.31  | 0 | -0.245 | NO           |
| ALDOA     | -120.184.967.794.157 | 0.037 | 0.683 | 0 | -0.646 | UP in CVS-TO |
| PPP4C     | -0.218694404456799   | 0.16  | 0.321 | 0 | -0.161 | NO           |
| HSD11B2   | -0.560912508585168   | 0.008 | 0.296 | 0 | -0.288 | NO           |
| ATP6V0D1  | -0.305159286587127   | 0.058 | 0.267 | 0 | -0.209 | NO           |
| NUTF2     | -0.216848214696814   | 0.158 | 0.312 | 0 | -0.154 | NO           |
| GCSH      | 0.923069537391526    | 0.767 | 0.325 | 0 | 0.442  | UP in TSC-TO |
| MAP1LC3B  | -0.251046093911221   | 0.103 | 0.274 | 0 | -0.171 | NO           |
| SLC7A5    | -0.609050829984783   | 0.05  | 0.374 | 0 | -0.324 | UP in CVS-TO |
| CYBA      | -0.432089827233844   | 0.283 | 0.533 | 0 | -0.25  | NO           |
| RPL13     | 0.812628906319249    | 0.997 | 0.982 | 0 | 0.015  | UP in TSC-TO |
| TCF25     | -0.27765433361883    | 0.17  | 0.351 | 0 | -0.181 | NO           |
| SLC43A2   | -0.511914218264676   | 0.175 | 0.455 | 0 | -0.28  | NO           |
| RNASEK    | 0.614770642975478    | 0.369 | 0.012 | 0 | 0.357  | UP in TSC-TO |
| GABARAP   | 0.433290315493337    | 0.282 | 0.02  | 0 | 0.262  | NO           |
| EIF5A     | -0.399783230488332   | 0.353 | 0.564 | 0 | -0.211 | NO           |
| EIF4A1    | 0.987927615602067    | 0.679 | 0.264 | 0 | 0.415  | UP in TSC-TO |
| RPL26     | 132.630.847.919.517  | 0.994 | 0.878 | 0 | 0.116  | UP in TSC-TO |
| RPL23A    | 0.99497203625882     | 0.993 | 0.888 | 0 | 0.105  | UP in TSC-TO |
| NUFIP2    | -0.345320933351457   | 0.057 | 0.277 | 0 | -0.22  | NO           |
| SUZ12     | -0.204318226974784   | 0.127 | 0.266 | 0 | -0.139 | NO           |
| PSMD11    | -0.254069289473863   | 0.162 | 0.336 | 0 | -0.174 | NO           |
| RPL23     | 139.800.512.250.404  | 0.96  | 0.655 | 0 | 0.305  | UP in TSC-TO |
| RPL19     | 0.633046908825134    | 0.995 | 0.964 | 0 | 0.031  | UP in TSC-TO |
| KRT23     | -0.371750361363605   | 0.355 | 0.574 | 0 | -0.219 | NO           |
| KRT19     | 0.907804625327665    | 0.826 | 0.554 | 0 | 0.272  | UP in TSC-TO |
| HSD17B1   | -14.725.110.036.344  | 0.371 | 0.868 | 0 | -0.497 | UP in CVS-TO |
| RPL27     | 0.310490840521772    | 0.967 | 0.809 | 0 | 0.158  | NO           |
| GRN       | -0.227098843318946   | 0.106 | 0.256 | 0 | -0.15  | NO           |
| HEXIM1    | -0.503136576019134   | 0.038 | 0.34  | 0 | -0.302 | NO           |
| ATP5G1    | -0.76728878310292    | 0     | 0.474 | 0 | -0.474 | UP in CVS-TO |
| LRRC59    | -0.227337494802669   | 0.126 | 0.287 | 0 | -0.161 | NO           |
| NME2      | 202.682.124.286.675  | 0.931 | 0.043 | 0 | 0.888  | UP in TSC-TO |
| CLTC      | -0.329539273878245   | 0.113 | 0.327 | 0 | -0.214 | NO           |
| CSH1      | -177.466.272.621.146 | 0.002 | 0.532 | 0 | -0.53  | UP in CVS-TO |
| DDX5      | -0.27964509568145    | 0.239 | 0.427 | 0 | -0.188 | NO           |
| RPL38     | 0.400989741430947    | 0.846 | 0.715 | 0 | 0.131  | NO           |
| ATP5H     | -0.426379035982096   | 0     | 0.29  | 0 | -0.29  | NO           |
| TIMP2     | -152.235.531.040.835 | 0.052 | 0.604 | 0 | -0.552 | UP in CVS-TO |
| P4HB      | -0.491213761871193   | 0.385 | 0.623 | 0 | -0.238 | NO           |
| ARHGDI1A  | -0.3067800788502     | 0.087 | 0.298 | 0 | -0.211 | NO           |
| NPB       | -0.539886583115718   | 0.003 | 0.297 | 0 | -0.294 | NO           |
| STRA13    | -0.4079779022971     | 0     | 0.267 | 0 | -0.267 | NO           |
| SLC16A3   | -0.342681833356221   | 0.177 | 0.38  | 0 | -0.203 | NO           |
| ATP5A1    | -0.729998589136215   | 0     | 0.466 | 0 | -0.466 | UP in CVS-TO |
| RPL17     | 306.976.195.025.761  | 0.995 | 0.207 | 0 | 0.788  | UP in TSC-TO |
| LMAN1     | -0.339686596888195   | 0.212 | 0.388 | 0 | -0.176 | NO           |
| RRBP1     | -0.35235637166464    | 0.13  | 0.336 | 0 | -0.206 | NO           |
| ACSS1     | -0.395675623990705   | 0.014 | 0.277 | 0 | -0.263 | NO           |
| HM13      | -0.280063569901869   | 0.063 | 0.251 | 0 | -0.188 | NO           |
| RPN2      | -0.332752552412669   | 0.249 | 0.437 | 0 | -0.188 | NO           |
| TGM2      | -0.563968145191838   | 0.324 | 0.579 | 0 | -0.255 | NO           |
| NCOA3     | -0.473594200337399   | 0.071 | 0.349 | 0 | -0.278 | NO           |
| ZFAS1     | 0.375785574547233    | 0.522 | 0.337 | 0 | 0.185  | NO           |

|          |                      |       |       |   |                    |              |
|----------|----------------------|-------|-------|---|--------------------|--------------|
| CEBPB    | -0.643362602561228   | 0.206 | 0.557 | 0 | -0.351             | UP in CVS-TO |
| ATP5E    | -107.527.027.868.411 | 0     | 0.596 | 0 | -0.596             | UP in CVS-TO |
| ADRM1    | -0.235902263680071   | 0.135 | 0.302 | 0 | -0.167             | NO           |
| RPS21    | 0.754105566152483    | 0.972 | 0.81  | 0 | 0.162              | UP in TSC-TO |
| PTBP1    | -0.213971176389543   | 0.123 | 0.278 | 0 | -0.155             | NO           |
| ATP5D    | -0.79784609571371    | 0     | 0.486 | 0 | -0.486             | UP in CVS-TO |
| RPS15    | 0.63536243629658     | 0.993 | 0.967 | 0 | 0.026              | UP in TSC-TO |
| MBD3     | -0.370164966790938   | 0.106 | 0.348 | 0 | -0.242             | NO           |
| AES      | -0.805648956172102   | 0     | 0.486 | 0 | -0.486             | UP in CVS-TO |
| MFSD12   | -0.595983371304332   | 0.115 | 0.435 | 0 | -0.32              | NO           |
| EEF2     | -0.343637464854775   | 0.549 | 0.749 | 0 | -0.2               | NO           |
| MAP2K2   | -0.247431720595813   | 0.147 | 0.322 | 0 | -0.175             | NO           |
| MYDGF    | -0.526613332016669   | 0.299 | 0.518 | 0 | -0.219             | NO           |
| RPL36    | 0.479613893212339    | 0.986 | 0.924 | 0 | 0.0619999999999999 | NO           |
| MLLT1    | -0.675671792027797   | 0.278 | 0.607 | 0 | -0.329             | UP in CVS-TO |
| EIF3G    | -0.306664255659967   | 0.253 | 0.451 | 0 | -0.198             | NO           |
| C19orf43 | -0.67488726776348    | 0     | 0.44  | 0 | -0.44              | UP in CVS-TO |
| CALR     | -101.952.071.720.406 | 0.421 | 0.78  | 0 | -0.359             | UP in CVS-TO |
| TECR     | -0.337271964035985   | 0.229 | 0.428 | 0 | -0.199             | NO           |
| BRD4     | -0.300836329283554   | 0.133 | 0.323 | 0 | -0.19              | NO           |
| TPM4     | -0.25686905469292    | 0.249 | 0.419 | 0 | -0.17              | NO           |
| RPL18A   | 0.411672340232132    | 0.994 | 0.965 | 0 | 0.029              | NO           |
| JUND     | -0.819603548822229   | 0.335 | 0.739 | 0 | -0.404             | UP in CVS-TO |
| GDF15    | -29.388.569.243.622  | 0.172 | 0.857 | 0 | -0.685             | UP in CVS-TO |
| ISYNA1   | -0.315018866065432   | 0.298 | 0.478 | 0 | -0.18              | NO           |
| FKBP8    | -0.234310600896992   | 0.104 | 0.266 | 0 | -0.162             | NO           |
| UBA52    | 0.54533795287799     | 0.98  | 0.835 | 0 | 0.145              | NO           |
| NDUFA13  | 0.599212005719639    | 0.596 | 0.293 | 0 | 0.303              | NO           |
| CEBPA    | -0.321126880155271   | 0.124 | 0.324 | 0 | -0.2               | NO           |
| FXVD3    | -0.387621713647775   | 0.156 | 0.404 | 0 | -0.248             | NO           |
| RPS16    | 115.001.223.694.554  | 0.994 | 0.892 | 0 | 0.102              | UP in TSC-TO |
| TGFB1    | -0.483727216734937   | 0.019 | 0.295 | 0 | -0.276             | NO           |
| RPS19    | 0.521650843812961    | 0.996 | 0.982 | 0 | 0.014              | NO           |
| RABAC1   | -0.311981831723704   | 0.147 | 0.33  | 0 | -0.183             | NO           |
| PSG3     | -151.368.255.686.069 | 0.1   | 0.597 | 0 | -0.497             | UP in CVS-TO |
| PSG1     | -0.793518264932223   | 0.019 | 0.365 | 0 | -0.346             | UP in CVS-TO |
| PSG6     | -0.627075281785866   | 0.068 | 0.361 | 0 | -0.293             | UP in CVS-TO |
| PSG2     | -0.331489154286083   | 0.103 | 0.296 | 0 | -0.193             | NO           |
| PSG5     | -0.738261975647437   | 0.06  | 0.392 | 0 | -0.332             | UP in CVS-TO |
| PSG4     | -0.650562730341426   | 0.025 | 0.342 | 0 | -0.317             | UP in CVS-TO |
| SNRPD2   | 0.399064467457476    | 0.55  | 0.38  | 0 | 0.17               | NO           |
| GLTSCR2  | -0.471507110183082   | 0     | 0.314 | 0 | -0.314             | NO           |
| SEPW1    | -0.49118210077108    | 0     | 0.33  | 0 | -0.33              | NO           |
| RPL18    | 0.837213731163318    | 0.995 | 0.953 | 0 | 0.042              | UP in TSC-TO |
| CGB      | -279.779.561.741.413 | 0     | 0.823 | 0 | -0.823             | UP in CVS-TO |
| CGB8     | -0.537290246619306   | 0.02  | 0.304 | 0 | -0.284             | NO           |
| CGB7     | -0.406410895666562   | 0.027 | 0.262 | 0 | -0.235             | NO           |
| RPL13A   | 11.708.045.989.596   | 0.979 | 0.834 | 0 | 0.145              | UP in TSC-TO |
| RPS11    | 102.944.418.197.426  | 0.984 | 0.83  | 0 | 0.154              | UP in TSC-TO |
| NDUFA3   | -0.267901381974136   | 0.144 | 0.327 | 0 | -0.183             | NO           |
| RPS9     | 0.341597421073848    | 0.974 | 0.87  | 0 | 0.104              | NO           |
| RPL28    | 0.91310813820936     | 0.995 | 0.966 | 0 | 0.029              | UP in TSC-TO |
| RPS5     | 0.741555158224845    | 0.99  | 0.877 | 0 | 0.113              | UP in TSC-TO |
| TRIM28   | -0.275725567076089   | 0.135 | 0.319 | 0 | -0.184             | NO           |
| UBE2M    | -0.356635844014013   | 0.176 | 0.408 | 0 | -0.232             | NO           |

|         |                      |       |       |   |        |              |
|---------|----------------------|-------|-------|---|--------|--------------|
| RPS4Y1  | -0.967608438533627   | 0     | 0.567 | 0 | -0.567 | UP in CVS-TO |
| COMT    | -0.310614533365867   | 0.418 | 0.599 | 0 | -0.181 | NO           |
| SDF2L1  | -0.420477551904609   | 0.098 | 0.339 | 0 | -0.241 | NO           |
| CHCHD10 | -0.27049038540766    | 0.137 | 0.325 | 0 | -0.188 | NO           |
| MIF     | 0.949311292814223    | 0.956 | 0.698 | 0 | 0.258  | UP in TSC-TO |
| XBP1    | -0.220192810537509   | 0.109 | 0.252 | 0 | -0.143 | NO           |
| HMOX1   | -0.465303107203604   | 0.137 | 0.4   | 0 | -0.263 | NO           |
| H1FO    | -0.377432624349623   | 0.022 | 0.269 | 0 | -0.247 | NO           |
| EIF3L   | -0.236718531608622   | 0.205 | 0.367 | 0 | -0.162 | NO           |
| DDX17   | -0.349938678229583   | 0.132 | 0.355 | 0 | -0.223 | NO           |
| ATF4    | -0.257791767018043   | 0.14  | 0.316 | 0 | -0.176 | NO           |
| FBLN1   | -139.385.212.209.606 | 0.314 | 0.818 | 0 | -0.504 | UP in CVS-TO |
| PIM3    | -0.409922767856502   | 0.098 | 0.351 | 0 | -0.253 | NO           |
| BTG3    | -0.271678570788716   | 0.152 | 0.309 | 0 | -0.157 | NO           |
| ATP5J   | -0.72060334916831    | 0     | 0.454 | 0 | -0.454 | UP in CVS-TO |
| ATP5O   | -0.582913425549418   | 0     | 0.378 | 0 | -0.378 | NO           |
| PDXK    | -0.21552281116782    | 0.109 | 0.254 | 0 | -0.145 | NO           |
| MT-ND2  | -0.894004803463537   | 0.965 | 0.978 | 0 | -0.013 | UP in CVS-TO |
| MT-CO1  | -0.838555180037376   | 0.995 | 1     | 0 | -0.005 | UP in CVS-TO |
| MT-CO2  | -0.378484116912247   | 1     | 1     | 0 |        | 0,000 NO     |
| MT-ATP8 | -104.762.764.989.653 | 0.072 | 0.587 | 0 | -0.515 | UP in CVS-TO |
| MT-ATP6 | 0.352271008254139    | 0.999 | 1     | 0 | -0.001 | NO           |
| MT-CO3  | 0.528788143432152    | 1     | 1     | 0 |        | 0,000 NO     |
| MT-ND3  | -150.403.423.422.521 | 0.979 | 1     | 0 | -0.021 | UP in CVS-TO |
| MT-ND4L | -236.784.143.702.019 | 0.284 | 0.916 | 0 | -0.632 | UP in CVS-TO |
| MT-ND6  | -0.516348694177854   | 0.206 | 0.464 | 0 | -0.258 | NO           |
| MT-CYB  | 0.480749346370762    | 0.999 | 0.999 | 0 |        | 0,000 NO     |
| MICOS10 | 0.523017718701195    | 0.324 | 0     | 0 | 0.324  | NO           |
| ATP5IF1 | 0.622737070573654    | 0.374 | 0     | 0 | 0.374  | UP in TSC-TO |
| ATP5PB  | 0.402421893393196    | 0.256 | 0     | 0 | 0.256  | NO           |
| GAS5    | 0.810556532417352    | 0.463 | 0     | 0 | 0.463  | UP in TSC-TO |
| ATP5MC3 | 131.978.756.361.562  | 0.711 | 0     | 0 | 0.711  | UP in TSC-TO |
| ATP5ME  | 0.474220599397162    | 0.283 | 0     | 0 | 0.283  | NO           |
| RACK1   | 273.764.807.444.805  | 0.99  | 0     | 0 | 0.99   | UP in TSC-TO |
| TOMM6   | 0.910759773660298    | 0.53  | 0     | 0 | 0.53   | UP in TSC-TO |
| SNHG5   | 0.805305541949424    | 0.468 | 0     | 0 | 0.468  | UP in TSC-TO |
| SEPTIN7 | 0.464457852903259    | 0.295 | 0     | 0 | 0.295  | NO           |
| SEM1    | 0.61303988859782     | 0.378 | 0     | 0 | 0.378  | UP in TSC-TO |
| ATP5MF  | 0.888340520479872    | 0.487 | 0     | 0 | 0.487  | UP in TSC-TO |
| RBIS    | 0.423681104339099    | 0.271 | 0     | 0 | 0.271  | NO           |
| ATP5F1C | 0.754659936972075    | 0.455 | 0     | 0 | 0.455  | UP in TSC-TO |
| ATP5MD  | 0.578135123788755    | 0.341 | 0     | 0 | 0.341  | NO           |
| H19     | 147.072.740.921.375  | 0.699 | 0     | 0 | 0.699  | UP in TSC-TO |
| SELENOH | 0.59347792687673     | 0.376 | 0     | 0 | 0.376  | NO           |
| PLAAT3  | 0.59673165190564     | 0.351 | 0     | 0 | 0.351  | NO           |
| ATP5MG  | 0.948060056167287    | 0.519 | 0     | 0 | 0.519  | UP in TSC-TO |
| ATP5MC2 | 10.300.398.744.774   | 0.56  | 0     | 0 | 0.56   | UP in TSC-TO |
| ATP5F1B | 0.559357517410236    | 0.341 | 0     | 0 | 0.341  | NO           |
| RTRAF   | 0.46409499788769     | 0.296 | 0     | 0 | 0.296  | NO           |
| ATP5MPL | 0.897237676679291    | 0.515 | 0     | 0 | 0.515  | UP in TSC-TO |
| PCLAF   | 0.644473165956993    | 0.375 | 0     | 0 | 0.375  | UP in TSC-TO |
| MESD    | 0.40200865186436     | 0.254 | 0     | 0 | 0.254  | NO           |
| ELOB    | 0.68344905293854     | 0.409 | 0     | 0 | 0.409  | UP in TSC-TO |
| SNHG29  | 174.474.037.567.384  | 0.882 | 0     | 0 | 0.882  | UP in TSC-TO |
| ATP5MC1 | 0.853125291867988    | 0.469 | 0     | 0 | 0.469  | UP in TSC-TO |



|           |                    |       |       |                  |              |
|-----------|--------------------|-------|-------|------------------|--------------|
| ATP5PD    | 0.507735126614888  | 0.311 | 0     | 0 0.311          | NO           |
| JPT1      | 0.508695046168281  | 0.294 | 0     | 0 0.294          | NO           |
| ATP5F1A   | 0.577464329734495  | 0.35  | 0     | 0 0.35           | NO           |
| ATP5F1D   | 0.735380995431521  | 0.438 | 0     | 0 0.438          | UP in TSC-TO |
| TRIR      | 0.457150206056821  | 0.293 | 0     | 0 0.293          | NO           |
| NOP53     | 0.422085596878065  | 0.261 | 0     | 0 0.261          | NO           |
| SELENOW   | 0.781992569761754  | 0.469 | 0     | 0 0.469          | UP in TSC-TO |
| ATP5F1E   | 0.988394042040137  | 0.499 | 0     | 0 0.499          | UP in TSC-TO |
| ATP5PF    | 0.7993294797109    | 0.467 | 0     | 0 0.467          | UP in TSC-TO |
| ATP5PO    | 0.676290248246577  | 0.413 | 0     | 0 0.413          | UP in TSC-TO |
| TCEAL9    | 0.543583074709424  | 0.327 | 0     | 0 0.327          | NO           |
| BEX3      | 0.714427110609475  | 0.413 | 0     | 0 0.413          | UP in TSC-TO |
| DUSP9     | -0.282208453193199 | 0.345 | 0.516 | 6,72E-289 -0.171 | NO           |
| GABARAPL1 | -0.188160523189806 | 0.119 | 0.252 | 7,09E-285 -0.133 | NO           |
| YWHAE     | -0.276641907520207 | 0.364 | 0.525 | 4,44E-283 -0.161 | NO           |
| ACADVL    | -0.204288676043485 | 0.154 | 0.297 | 1,19E-282 -0.143 | NO           |
| HMGB2     | 0.269141868159113  | 0.332 | 0.177 | 1,36E-282 0.155  | NO           |
| PSMC5     | -0.208822358402849 | 0.176 | 0.324 | 1,48E-280 -0.148 | NO           |
| CALM2     | 0.305980918651548  | 0.527 | 0.377 | 1,85E-279 0.15   | NO           |
| MGST3     | 0.273056001679149  | 0.775 | 0.633 | 1,10E-277 0.142  | NO           |
| SSR2      | -0.291741931221978 | 0.306 | 0.459 | 1,80E-277 -0.153 | NO           |
| SIGLEC6   | 0.242797313278648  | 0.25  | 0.113 | 1,57E-274 0.137  | NO           |
| EIF1AX    | 0.26995547782675   | 0.42  | 0.268 | 1,36E-270 0.152  | NO           |
| H2AFJ     | -0.190271266619982 | 0.136 | 0.271 | 4,13E-268 -0.135 | NO           |
| CDC42     | -0.269580198487242 | 0.365 | 0.521 | 1,20E-267 -0.156 | NO           |
| NONO      | -0.183278448369207 | 0.134 | 0.268 | 6,01E-266 -0.134 | NO           |
| KRT8      | -0.183493757461714 | 0.8   | 0.914 | 9,83E-266 -0.114 | NO           |
| MSX2      | -0.211672139278383 | 0.167 | 0.308 | 1,63E-263 -0.141 | NO           |
| EFEMP1    | -0.257516000138505 | 0.18  | 0.318 | 3,36E-261 -0.138 | NO           |
| CSDE1     | -0.204151005065786 | 0.191 | 0.338 | 5,51E-259 -0.147 | NO           |
| COPE      | -0.227370141853912 | 0.234 | 0.385 | 5,69E-257 -0.151 | NO           |
| EIF4B     | -0.23464233816461  | 0.286 | 0.444 | 1,89E-254 -0.158 | NO           |
| AKR7A2    | 0.241269126197353  | 0.295 | 0.157 | 7,71E-252 0.138  | NO           |
| TMBIM6    | -0.331699489399951 | 0.487 | 0.619 | 3,54E-251 -0.132 | NO           |
| PSMB7     | -0.19002950806014  | 0.166 | 0.304 | 1,15E-250 -0.138 | NO           |
| UQCR11    | 0.309079627117281  | 0.457 | 0.326 | 1,94E-247 0.131  | NO           |
| TMED2     | -0.20661761961954  | 0.188 | 0.328 | 1,94E-245 -0.14  | NO           |
| NUCB2     | -0.23832905652816  | 0.189 | 0.329 | 1,02E-245 -0.14  | NO           |
| ATP6V1G1  | -0.246999677355817 | 0.306 | 0.458 | 1,80E-244 -0.152 | NO           |
| NDUFA4    | 0.326971807594363  | 0.586 | 0.466 | 1,41E-242 0.12   | NO           |
| COX7C     | 0.268732969307893  | 0.75  | 0.632 | 2,07E-242 0.118  | NO           |
| EIF2AK1   | -0.183514832433438 | 0.141 | 0.269 | 4,32E-242 -0.128 | NO           |
| PRDX6     | -0.276532295887857 | 0.432 | 0.585 | 2,66E-240 -0.153 | NO           |
| PCBP1     | -0.234956134523992 | 0.336 | 0.493 | 1,01E-238 -0.157 | NO           |
| KDELRL1   | -0.211163698247225 | 0.21  | 0.352 | 2,05E-237 -0.142 | NO           |
| ALYREF    | -0.201269484226694 | 0.177 | 0.313 | 2,37E-236 -0.136 | NO           |
| HMGA1     | -0.290110631137302 | 0.422 | 0.569 | 1,19E-235 -0.147 | NO           |
| CHCHD2    | 0.244355793149792  | 0.753 | 0.613 | 5,88E-235 0.14   | NO           |
| TXNDC17   | 0.234276614646939  | 0.284 | 0.153 | 4,89E-232 0.131  | NO           |
| PERP      | 0.293507782471309  | 0.478 | 0.351 | 5,99E-227 0.127  | NO           |
| PTTG1IP   | -0.178709400489104 | 0.148 | 0.274 | 6,67E-226 -0.126 | NO           |
| ENSA      | -0.198983586920435 | 0.227 | 0.37  | 1,02E-225 -0.143 | NO           |
| CCNE1     | 0.315691488629546  | 0.466 | 0.336 | 4,22E-226 0.13   | NO           |
| TUBA1B    | 0.328395278386075  | 0.662 | 0.542 | 7,20E-222 0.12   | NO           |
| SLC25A6   | -0.288084882763499 | 0.623 | 0.72  | 6,97E-221 -0.097 | NO           |

|          |                    |       |       |           |                      |    |
|----------|--------------------|-------|-------|-----------|----------------------|----|
| TIMM17A  | -0.164931619094826 | 0.13  | 0.25  | 1,31E-219 | -0.12                | NO |
| BSG      | -0.189476145733219 | 0.378 | 0.55  | 7,81E-218 | -0.172               | NO |
| MORF4L1  | -0.230129195426579 | 0.354 | 0.502 | 8,65E-217 | -0.148               | NO |
| PSMD2    | -0.162878332585738 | 0.135 | 0.254 | 8,53E-213 | -0.119               | NO |
| RPL36AL  | 0.264568396257189  | 0.61  | 0.497 | 8,58E-213 | 0.113                | NO |
| SERP1    | -0.216471845963887 | 0.315 | 0.463 | 1,45E-211 | -0.148               | NO |
| RAN      | 0.23285038352304   | 0.757 | 0.614 | 7,37E-211 | 0.143                | NO |
| C4orf3   | 0.270201410282116  | 0.385 | 0.256 | 1,90E-211 | 0.129                | NO |
| RPL3     | 0.223827567151145  | 0.985 | 0.948 | 1,30E-209 | 0.037                | NO |
| NPM1     | 0.197363877631034  | 0.954 | 0.825 | 7,44E-209 | 0.129                | NO |
| S100A13  | 0.244584825914318  | 0.259 | 0.139 | 1,18E-208 | 0.12                 | NO |
| EIF3E    | 0.250482044766892  | 0.55  | 0.427 | 3,70E-206 | 0.123                | NO |
| SNRPD1   | 0.248205096064053  | 0.504 | 0.374 | 6,57E-202 | 0.13                 | NO |
| POLR2L   | -0.238490941652503 | 0.37  | 0.516 | 1,10E-200 | -0.146               | NO |
| RNPS1    | -0.164383572246957 | 0.15  | 0.268 | 3,26E-196 | -0.118               | NO |
| UQCRFS1  | -0.185633980182466 | 0.226 | 0.359 | 2,03E-194 | -0.133               | NO |
| ATP6V1E1 | -0.188683609051693 | 0.204 | 0.332 | 8,11E-192 | -0.128               | NO |
| MT-ND1   | -0.311719874014044 | 0.973 | 0.978 | 8,80E-190 | -0.005               | NO |
| TUBA1C   | 0.333316961920494  | 0.491 | 0.393 | 1,82E-189 | 0.098                | NO |
| ATP1B3   | -0.197084890718722 | 0.228 | 0.358 | 2,33E-188 | -0.13                | NO |
| HNRNPK   | -0.227763299634933 | 0.402 | 0.535 | 9,58E-187 | -0.133               | NO |
| APP      | -0.187538991302722 | 0.177 | 0.296 | 1,37E-184 | -0.119               | NO |
| SERPINF1 | -0.166987012930071 | 0.156 | 0.272 | 2,30E-183 | -0.116               | NO |
| ARPC2    | 0.245527146263686  | 0.573 | 0.469 | 2,60E-183 | 0.104                | NO |
| ATP6V1F  | -0.157262233278564 | 0.141 | 0.253 | 3,42E-183 | -0.112               | NO |
| SFPQ     | -0.189403977534954 | 0.236 | 0.365 | 7,96E-180 | -0.129               | NO |
| PSMC3    | -0.16352660122491  | 0.176 | 0.296 | 1,03E-179 | -0.12                | NO |
| EEF1D    | -0.247258990579116 | 0.578 | 0.69  | 1,44E-180 | -0.112               | NO |
| GSTP1    | 0.222219331386144  | 0.894 | 0.779 | 2,79E-174 | 0.115                | NO |
| HNRNPA0  | -0.152798810559529 | 0.153 | 0.266 | 4,50E-174 | -0.113               | NO |
| MYL6     | 0.248289291928252  | 0.793 | 0.703 | 1,84E-172 | 0.09000000000000001  | NO |
| ANP32B   | 0.232220336050871  | 0.457 | 0.34  | 1,32E-171 | 0.117                | NO |
| ANAPC11  | 0.226496885016472  | 0.355 | 0.239 | 4,13E-169 | 0.116                | NO |
| SLC25A1  | -0.15749633163283  | 0.15  | 0.259 | 4,64E-167 | -0.109               | NO |
| CYCS     | -0.1820327649016   | 0.24  | 0.367 | 1,86E-166 | -0.127               | NO |
| MT-ND4   | 0.199409177351782  | 0.99  | 0.993 | 2,86E-166 | -0.003               | NO |
| PRDX1    | -0.232339050141253 | 0.841 | 0.847 | 5,89E-164 | -0.00600000000000001 | NO |
| PFDN2    | -0.155689179810353 | 0.192 | 0.311 | 1,35E-162 | -0.119               | NO |
| COX6C    | -0.22354447399612  | 0.493 | 0.622 | 1,82E-162 | -0.129               | NO |
| TOP1     | -0.203892802775276 | 0.25  | 0.373 | 1,61E-161 | -0.123               | NO |
| GHITM    | -0.155645906893209 | 0.188 | 0.305 | 9,01E-161 | -0.117               | NO |
| ARPC3    | 0.239268297205744  | 0.523 | 0.423 | 2,23E-160 | 0.1                  | NO |
| RPS28    | 0.287227543031303  | 0.99  | 0.978 | 1,35E-159 | 0.012                | NO |
| LMNA     | -0.160625741680414 | 0.229 | 0.352 | 9,91E-155 | -0.123               | NO |
| QPRT     | -0.185139410955822 | 0.294 | 0.42  | 1,03E-154 | -0.126               | NO |
| PLIN2    | 0.470457238188969  | 0.357 | 0.259 | 1,26E-154 | 0.098                | NO |
| PEG3     | -0.234224900124063 | 0.289 | 0.408 | 1,05E-152 | -0.119               | NO |
| PPA1     | 0.215271248870499  | 0.445 | 0.332 | 3,09E-152 | 0.113                | NO |
| CNPY2    | -0.151709727486533 | 0.185 | 0.297 | 1,14E-152 | -0.112               | NO |
| MRPL4    | -0.156206686519277 | 0.165 | 0.271 | 8,17E-151 | -0.106               | NO |
| PSMB4    | -0.144214122708182 | 0.171 | 0.282 | 1,54E-150 | -0.111               | NO |
| TFG      | -0.141432969241794 | 0.168 | 0.277 | 1,92E-148 | -0.109               | NO |
| HSPA9    | -0.148033680949487 | 0.19  | 0.302 | 6,45E-147 | -0.112               | NO |
| SMS      | 0.2617450525581    | 0.533 | 0.45  | 4,47E-148 | 0.083                | NO |
| PSMA1    | -0.172993312204868 | 0.298 | 0.422 | 1,19E-146 | -0.124               | NO |

|          |                    |       |       |           |                    |    |
|----------|--------------------|-------|-------|-----------|--------------------|----|
| SRP14    | 0.217896269419495  | 0.637 | 0.547 | 2,88E-145 | 0.09               | NO |
| ITM2B    | -0.30258267416706  | 0.456 | 0.554 | 3,35E-144 | -0.098             | NO |
| TKT      | -0.212639993682291 | 0.496 | 0.609 | 1,89E-142 | -0.113             | NO |
| HMG20B   | -0.155612071516158 | 0.167 | 0.271 | 2,36E-142 | -0.104             | NO |
| BCAP31   | -0.160758594547611 | 0.219 | 0.332 | 2,49E-142 | -0.113             | NO |
| EIF1     | -0.20374093095388  | 0.833 | 0.835 | 3,33E-143 | -0.002             | NO |
| ABCG2    | -0.176245150971739 | 0.156 | 0.255 | 4,28E-142 | -0.099             | NO |
| CSTB     | 0.338048893078597  | 0.576 | 0.516 | 4,39E-142 | 0.0599999999999999 | NO |
| IER2     | -0.16453464737886  | 0.207 | 0.322 | 6,92E-142 | -0.115             | NO |
| MZT2B    | 0.204258414522797  | 0.454 | 0.343 | 8,51E-142 | 0.111              | NO |
| EIF3A    | -0.15813235055748  | 0.24  | 0.358 | 1,40E-138 | -0.118             | NO |
| SEC62    | -0.152537733478003 | 0.156 | 0.256 | 2,74E-136 | -0.1               | NO |
| KPNB1    | -0.147018623016523 | 0.172 | 0.275 | 3,87E-136 | -0.103             | NO |
| SCAND1   | -0.133569093647789 | 0.161 | 0.263 | 4,01E-135 | -0.102             | NO |
| HMGN1    | 0.191066267329683  | 0.523 | 0.409 | 1,86E-133 | 0.114              | NO |
| LSM5     | 0.181702421009554  | 0.291 | 0.189 | 1,15E-132 | 0.102              | NO |
| NDUFA11  | 0.219622328542219  | 0.459 | 0.362 | 2,12E-132 | 0.097              | NO |
| SOD1     | -0.204111332631283 | 0.431 | 0.548 | 8,63E-132 | -0.117             | NO |
| SERF2    | 0.195210293496976  | 0.965 | 0.892 | 4,53E-130 | 0.073              | NO |
| COX7A2L  | -0.147126989257954 | 0.224 | 0.334 | 5,32E-127 | -0.11              | NO |
| ACTG1    | 0.260418292469006  | 0.953 | 0.926 | 1,13E-126 | 0.0269999999999999 | NO |
| TBCA     | 0.208737280159973  | 0.414 | 0.316 | 2,55E-125 | 0.098              | NO |
| NDUFS6   | -0.155777949734423 | 0.269 | 0.384 | 2,73E-125 | -0.115             | NO |
| AURKAIP1 | -0.169286989219528 | 0.342 | 0.461 | 2,38E-123 | -0.119             | NO |
| HNRNPA1  | 0.183444182163174  | 0.87  | 0.735 | 2,85E-122 | 0.135              | NO |
| ADH5     | 0.168515294719796  | 0.256 | 0.16  | 7,03E-122 | 0.096              | NO |
| ANXA2    | -0.129031979405901 | 0.446 | 0.595 | 7,55E-122 | -0.149             | NO |
| XAGE2    | 0.273951875637141  | 0.623 | 0.562 | 3,21E-121 | 0.0609999999999999 | NO |
| SPTSSA   | -0.132702561036411 | 0.156 | 0.25  | 2,71E-120 | -0.094             | NO |
| PGK1     | 0.259281689656313  | 0.37  | 0.283 | 8,53E-119 | 0.087              | NO |
| FAM107B  | -0.170829298141898 | 0.213 | 0.314 | 2,52E-118 | -0.101             | NO |
| LAMTOR1  | -0.133774338815551 | 0.183 | 0.282 | 1,40E-116 | -0.099             | NO |
| ARID3A   | -0.160270071197904 | 0.291 | 0.403 | 4,49E-116 | -0.112             | NO |
| ZNF593   | -0.12900839059754  | 0.189 | 0.29  | 3,16E-115 | -0.101             | NO |
| NDUFA6   | -0.148163430587798 | 0.31  | 0.429 | 3,73E-116 | -0.119             | NO |
| AP2S1    | -0.181743620284885 | 0.416 | 0.527 | 4,39E-112 | -0.111             | NO |
| PDCD5    | 0.177003429008293  | 0.282 | 0.189 | 9,99E-111 | 0.093              | NO |
| SSBP1    | 0.195393816116919  | 0.393 | 0.299 | 4,92E-110 | 0.094              | NO |
| PSMD7    | -0.13387202002238  | 0.222 | 0.325 | 6,08E-110 | -0.103             | NO |
| CYB5A    | 0.172928561173781  | 0.35  | 0.251 | 2,51E-108 | 0.099              | NO |
| FIS1     | -0.121164764339569 | 0.178 | 0.272 | 7,63E-106 | -0.094             | NO |
| PRDX5    | 0.192683313380357  | 0.589 | 0.509 | 3,24E-105 | 0.08               | NO |
| CDC37    | -0.11985340048474  | 0.172 | 0.265 | 1,68E-104 | -0.093             | NO |
| SEC11A   | 0.169996654253784  | 0.435 | 0.336 | 3,79E-104 | 0.099              | NO |
| PRDX3    | 0.167930154436876  | 0.322 | 0.228 | 1,51E-102 | 0.094              | NO |
| HNRNPC   | -0.165965895142931 | 0.369 | 0.478 | 6,17E-102 | -0.109             | NO |
| DYNLL1   | 0.214105760643569  | 0.623 | 0.559 | 3,98E-100 | 0.0639999999999999 | NO |
| MYL12A   | -0.15309276510233  | 0.369 | 0.481 | 7,44E-100 | -0.112             | NO |
| CARHSP1  | -0.142624259654504 | 0.248 | 0.349 | 4,69E-99  | -0.101             | NO |
| SSR3     | -0.136005625962958 | 0.222 | 0.319 | 1,22E-98  | -0.097             | NO |
| UGP2     | 0.183388884860178  | 0.326 | 0.238 | 5,56E-99  | 0.088              | NO |
| IMPA2    | -0.141944420471156 | 0.217 | 0.313 | 6,45E-99  | -0.096             | NO |
| SUMO2    | 0.174437588317137  | 0.578 | 0.495 | 8,81E-98  | 0.083              | NO |
| CSNK1A1  | -0.116739195497523 | 0.17  | 0.26  | 1,93E-98  | -0.09              | NO |
| RAB11A   | -0.13634474885985  | 0.259 | 0.362 | 5,35E-96  | -0.103             | NO |

|         |                     |       |       |          |                     |    |
|---------|---------------------|-------|-------|----------|---------------------|----|
| PAGE4   | -0.200997609341573  | 0.904 | 0.942 | 4,53E-95 | -0.0379999999999999 | NO |
| HMG2    | -0.191830136250204  | 0.366 | 0.467 | 1,79E-94 | -0.101              | NO |
| SEC61G  | -0.142584680483826  | 0.342 | 0.454 | 6,58E-94 | -0.112              | NO |
| PPIA    | -0.240802463703595  | 0.784 | 0.754 | 1,97E-93 | 0.03                | NO |
| PSMD4   | -0.113272472026677  | 0.176 | 0.265 | 1,66E-92 | -0.089              | NO |
| NAP1L1  | 0.184111579967465   | 0.456 | 0.372 | 2,33E-92 | 0.084               | NO |
| GNG5    | 0.196281078333179   | 0.432 | 0.352 | 1,41E-91 | 0.08                | NO |
| OST4    | 0.201708827351432   | 0.468 | 0.397 | 7,05E-91 | 0.071               | NO |
| LRPAP1  | -0.124769948895039  | 0.202 | 0.293 | 5,22E-90 | -0.091              | NO |
| DEK     | 0.145510843128253   | 0.285 | 0.196 | 1,92E-89 | 0.089               | NO |
| DUT     | 0.173540667774086   | 0.303 | 0.217 | 5,31E-89 | 0.086               | NO |
| SMAGP   | -0.137503083436006  | 0.171 | 0.255 | 2,26E-88 | -0.084              | NO |
| HSPA8   | -0.155922975597133  | 0.493 | 0.605 | 5,79E-88 | -0.112              | NO |
| POLR2E  | -0.112159077753294  | 0.184 | 0.272 | 7,46E-88 | -0.088              | NO |
| CCT7    | -0.1136473457683    | 0.197 | 0.287 | 1,06E-88 | -0.09               | NO |
| LYPLA1  | -0.116813626478911  | 0.194 | 0.282 | 1,05E-84 | -0.088              | NO |
| OAZ1    | -0.168726348225388  | 0.623 | 0.704 | 1,30E-83 | -0.081              | NO |
| VDAC1   | 0.156895001113795   | 0.523 | 0.437 | 2,56E-83 | 0.086               | NO |
| CDKN1C  | -0.227262945577468  | 0.879 | 0.89  | 1,68E-83 | -0.011              | NO |
| CCT3    | -0.126097930505923  | 0.258 | 0.353 | 1,74E-82 | -0.095              | NO |
| ANXA5   | -0.164019334816315  | 0.544 | 0.641 | 2,74E-81 | -0.097              | NO |
| CKS1B   | 0.143859649530891   | 0.294 | 0.209 | 7,03E-80 | 0.085               | NO |
| HIGD2A  | -0.108375769336392  | 0.187 | 0.272 | 1,20E-80 | -0.085              | NO |
| SLC3A2  | -0.114470930425399  | 0.298 | 0.399 | 7,17E-79 | -0.101              | NO |
| XRCC6   | -0.121763695978083  | 0.281 | 0.38  | 1,25E-78 | -0.099              | NO |
| TUFM    | -0.117177255026346  | 0.245 | 0.338 | 3,97E-78 | -0.093              | NO |
| CLN3    | -0.124688281311099  | 0.234 | 0.323 | 7,34E-79 | -0.089              | NO |
| COX6B1  | -0.149704008067283  | 0.438 | 0.539 | 1,05E-77 | -0.101              | NO |
| POLR1D  | 0.147734127603877   | 0.296 | 0.214 | 1,20E-77 | 0.082               | NO |
| PSMB3   | -0.126127873220596  | 0.288 | 0.385 | 1,06E-76 | -0.097              | NO |
| PSAP    | -0.136861516813627  | 0.348 | 0.451 | 3,04E-76 | -0.103              | NO |
| PRDX2   | 0.179570779274626   | 0.598 | 0.54  | 4,04E-75 | 0.0579999999999999  | NO |
| NUDC    | -0.10845132164667   | 0.173 | 0.252 | 1,39E-75 | -0.079              | NO |
| NDUFB7  | -0.123911387995952  | 0.284 | 0.377 | 1,40E-73 | -0.093              | NO |
| MRPS15  | -0.125889947519366  | 0.331 | 0.427 | 1,51E-71 | -0.096              | NO |
| DBI     | -0.184153300542848  | 0.472 | 0.554 | 1,56E-72 | -0.0820000000000001 | NO |
| TUBB4B  | -0.102342644089134  | 0.342 | 0.452 | 2,12E-71 | -0.11               | NO |
| ERP29   | -0.149698063116885  | 0.365 | 0.455 | 2,96E-70 | -0.09               | NO |
| SNU13   | 0.17767556198309    | 0.462 | 0.395 | 1,01E-69 | 0.067               | NO |
| HNRNPU  | -0.135064927098244  | 0.278 | 0.365 | 2,85E-69 | -0.087              | NO |
| TXNL4A  | -0.0954681147710496 | 0.176 | 0.254 | 6,55E-68 | -0.078              | NO |
| PRRC2C  | -0.151023727944524  | 0.26  | 0.344 | 8,34E-68 | -0.084              | NO |
| COMMD6  | 0.14905227158836    | 0.3   | 0.225 | 1,03E-67 | 0.075               | NO |
| PKIB    | -0.129423870993704  | 0.295 | 0.384 | 4,61E-67 | -0.089              | NO |
| ARL6IP5 | -0.115789855134306  | 0.189 | 0.266 | 7,24E-67 | -0.077              | NO |
| CIRBP   | -0.0988275088580526 | 0.21  | 0.293 | 2,50E-66 | -0.083              | NO |
| MRFAP1  | -0.103302017891969  | 0.206 | 0.284 | 1,75E-61 | -0.078              | NO |
| NDUFC2  | 0.16444900559949    | 0.424 | 0.355 | 2,07E-61 | 0.069               | NO |
| CTNNB1  | -0.0833397011572544 | 0.178 | 0.253 | 1,96E-59 | -0.075              | NO |
| COX7B   | -0.112652823765674  | 0.405 | 0.508 | 6,37E-59 | -0.103              | NO |
| POLR2H  | -0.0968731527842427 | 0.216 | 0.295 | 1,16E-58 | -0.079              | NO |
| SPINT2  | -0.16694023874072   | 0.53  | 0.611 | 1,43E-59 | -0.081              | NO |
| BAX     | -0.0948198659846456 | 0.21  | 0.288 | 5,19E-57 | -0.078              | NO |
| IFI6    | 0.197863607655454   | 0.719 | 0.664 | 8,41E-57 | 0.0549999999999999  | NO |
| NR2F6   | -0.0908626518197871 | 0.256 | 0.342 | 1,19E-56 | -0.086              | NO |

|         |                     |       |       |          |                    |    |
|---------|---------------------|-------|-------|----------|--------------------|----|
| DSP     | 0.190370529190029   | 0.308 | 0.241 | 4,66E-57 | 0.067              | NO |
| ARPC5L  | -0.0875611796328669 | 0.177 | 0.25  | 5,23E-56 | -0.073             | NO |
| TIMP3   | -0.0719362397961082 | 0.215 | 0.295 | 4,77E-54 | -0.08              | NO |
| SRSF2   | -0.108032302025556  | 0.22  | 0.294 | 3,70E-53 | -0.074             | NO |
| PSMC1   | -0.0863180924521997 | 0.181 | 0.253 | 4,07E-53 | -0.072             | NO |
| SSB     | 0.135097722755084   | 0.293 | 0.225 | 4,63E-53 | 0.068              | NO |
| CYC1    | -0.0910854521359689 | 0.208 | 0.283 | 1,84E-52 | -0.075             | NO |
| CNN3    | -0.0938679875130147 | 0.183 | 0.252 | 2,22E-51 | -0.069             | NO |
| PA2G4   | 0.147725125317886   | 0.396 | 0.329 | 3,77E-51 | 0.067              | NO |
| CST3    | 0.146647602558107   | 0.305 | 0.239 | 5,37E-51 | 0.066              | NO |
| CD81    | 0.128985640923028   | 0.261 | 0.195 | 5,45E-50 | 0.066              | NO |
| NDUFB4  | 0.143103563306648   | 0.297 | 0.234 | 2,88E-49 | 0.063              | NO |
| SQLE    | -0.132227347871252  | 0.272 | 0.345 | 4,97E-48 | -0.073             | NO |
| NDUFB1  | -0.0809996408519116 | 0.215 | 0.292 | 6,01E-48 | -0.077             | NO |
| PKM     | -0.0875740576568764 | 0.503 | 0.616 | 9,95E-48 | -0.113             | NO |
| DSTN    | 0.133393165526417   | 0.533 | 0.473 | 2,01E-45 | 0.0600000000000001 | NO |
| PSMA5   | -0.0822003277947723 | 0.195 | 0.264 | 6,19E-45 | -0.069             | NO |
| RPS27L  | 0.183031076159529   | 0.355 | 0.303 | 2,74E-44 | 0.052              | NO |
| TOMM20  | 0.134380689848348   | 0.406 | 0.345 | 9,03E-44 | 0.0610000000000001 | NO |
| CLDN7   | 0.178754958014674   | 0.349 | 0.295 | 1,24E-43 | 0.054              | NO |
| APRT    | 0.121538265412181   | 0.399 | 0.335 | 1,44E-40 | 0.064              | NO |
| ENO1    | 0.136603800740996   | 0.793 | 0.728 | 3,56E-40 | 0.0650000000000001 | NO |
| SSU72   | -0.0787883734054535 | 0.222 | 0.292 | 5,60E-40 | -0.07              | NO |
| YWHAB   | -0.101468063611796  | 0.348 | 0.427 | 9,06E-40 | -0.079             | NO |
| NDUFB9  | -0.0844711947460696 | 0.218 | 0.285 | 1,58E-38 | -0.067             | NO |
| NDUFB11 | 0.142604485524523   | 0.391 | 0.338 | 2,49E-38 | 0.053              | NO |
| MDH2    | -0.0906804273391187 | 0.282 | 0.355 | 1,06E-36 | -0.073             | NO |
| RHEB    | -0.067499558688196  | 0.187 | 0.251 | 2,89E-36 | -0.064             | NO |
| PSMB5   | -0.0882124709706187 | 0.304 | 0.38  | 3,12E-36 | -0.076             | NO |
| GPX4    | 0.124505176881288   | 0.642 | 0.605 | 3,12E-37 | 0.037              | NO |
| YBX3    | 0.133186494345082   | 0.314 | 0.257 | 1,40E-35 | 0.057              | NO |
| FSTL3   | -0.419169512125404  | 0.303 | 0.376 | 1,53E-35 | -0.073             | NO |
| UBE2D3  | -0.07991053063765   | 0.259 | 0.331 | 1,86E-35 | -0.072             | NO |
| SEC61B  | -0.0873418692666115 | 0.384 | 0.467 | 9,97E-35 | -0.083             | NO |
| KDELR2  | -0.115044015381674  | 0.356 | 0.425 | 1,14E-34 | -0.069             | NO |
| RER1    | -0.0831914716213267 | 0.225 | 0.291 | 3,01E-34 | -0.066             | NO |
| COX5A   | 0.131317687018215   | 0.492 | 0.442 | 3,52E-33 | 0.05               | NO |
| PSMB6   | -0.0881102804387487 | 0.356 | 0.433 | 2,15E-32 | -0.077             | NO |
| CKS2    | -0.0936564957743468 | 0.207 | 0.269 | 9,30E-32 | -0.062             | NO |
| SRSF3   | -0.109132300440821  | 0.358 | 0.427 | 1,75E-31 | -0.069             | NO |
| ERGIC3  | -0.0794251697142685 | 0.221 | 0.284 | 1,87E-31 | -0.063             | NO |
| MRPL51  | 0.121302413461537   | 0.339 | 0.284 | 1,99E-31 | 0.055              | NO |
| NDUFB8  | 0.113915027758758   | 0.297 | 0.241 | 2,88E-31 | 0.056              | NO |
| NDUFS5  | 0.119599208749501   | 0.629 | 0.586 | 3,32E-31 | 0.043              | NO |
| MT-ND5  | -0.202768677239086  | 0.905 | 0.879 | 9,71E-31 | 0.026              | NO |
| ARPC1B  | 0.132232352812362   | 0.418 | 0.37  | 2,86E-30 | 0.048              | NO |
| PRMT1   | -0.075338168220729  | 0.195 | 0.254 | 3,34E-30 | -0.059             | NO |
| SNX6    | 0.111485912374563   | 0.303 | 0.248 | 1,52E-29 | 0.055              | NO |
| CCT6A   | -0.0909149253180684 | 0.32  | 0.39  | 3,24E-29 | -0.07              | NO |
| HNRNPDL | 0.126491016733008   | 0.426 | 0.374 | 5,57E-29 | 0.052              | NO |
| GUK1    | 0.117996942580657   | 0.326 | 0.275 | 9,36E-27 | 0.051              | NO |
| TIMM13  | -0.0825055593923465 | 0.309 | 0.379 | 1,59E-26 | -0.07              | NO |
| ARL6IP4 | -0.0632019899885746 | 0.193 | 0.251 | 5,54E-27 | -0.058             | NO |
| PAPOLA  | -0.0576628904419851 | 0.309 | 0.384 | 1,03E-25 | -0.075             | NO |
| CCT5    | -0.0780967974629828 | 0.296 | 0.363 | 3,23E-25 | -0.067             | NO |

|          |                     |       |       |          |                      |    |
|----------|---------------------|-------|-------|----------|----------------------|----|
| SPCS2    | -0.0774522481584219 | 0.238 | 0.298 | 9,73E-25 | -0.06                | NO |
| CLTA     | -0.112002720255417  | 0.548 | 0.605 | 2,79E-25 | -0.05699999999999999 | NO |
| DNAJB6   | -0.070100239872822  | 0.204 | 0.261 | 6,80E-24 | -0.057               | NO |
| LAMTOR4  | -0.0678851797473257 | 0.232 | 0.292 | 3,12E-23 | -0.06                | NO |
| SERBP1   | 0.099805424736407   | 0.432 | 0.38  | 2,55E-22 | 0.052                | NO |
| RCN1     | -0.0712088621032905 | 0.215 | 0.271 | 5,52E-22 | -0.056               | NO |
| BRI3     | 0.118263456924702   | 0.379 | 0.335 | 2,87E-21 | 0.044                | NO |
| REEP5    | -0.0891248111970334 | 0.283 | 0.341 | 1,24E-20 | -0.05800000000000001 | NO |
| RBBP7    | -0.0500143864073058 | 0.272 | 0.337 | 3,00E-19 | -0.065               | NO |
| GDI2     | -0.058668964441495  | 0.206 | 0.26  | 6,18E-19 | -0.054               | NO |
| SRRM2    | -0.108274980596884  | 0.261 | 0.311 | 7,48E-20 | -0.05                | NO |
| PDIA6    | -0.130517414140881  | 0.428 | 0.479 | 1,09E-18 | -0.051               | NO |
| SKP1     | 0.100673249688909   | 0.537 | 0.499 | 2,13E-18 | 0.038                | NO |
| NDUFV2   | 0.102213733799251   | 0.356 | 0.311 | 7,14E-18 | 0.045                | NO |
| PSMA7    | 0.134215543336957   | 0.448 | 0.418 | 1,76E-18 | 0.03                 | NO |
| CMTM6    | -0.0817064543622457 | 0.229 | 0.281 | 3,69E-16 | -0.052               | NO |
| HNRNPD   | -0.0708429794925149 | 0.301 | 0.359 | 4,43E-16 | -0.058               | NO |
| HMGB3    | 0.167500668192201   | 0.363 | 0.331 | 8,82E-16 | 0.032                | NO |
| NDUFA2   | -0.0502437459929063 | 0.205 | 0.258 | 9,02E-16 | -0.053               | NO |
| PHPT1    | 0.139348919459645   | 0.501 | 0.482 | 1,48E-15 | 0.019                | NO |
| YBX1     | 0.0891038282130883  | 0.591 | 0.542 | 4,58E-15 | 0.04899999999999999  | NO |
| TMEM258  | 0.115122301430796   | 0.399 | 0.363 | 5,23E-15 | 0.036                | NO |
| EIF3F    | -0.0753182711225027 | 0.372 | 0.43  | 6,15E-14 | -0.058               | NO |
| S100A6   | -0.0607298982392115 | 0.587 | 0.671 | 2,08E-13 | -0.08400000000000001 | NO |
| SNRPG    | 0.119899677942525   | 0.567 | 0.549 | 4,46E-13 | 0.01799999999999999  | NO |
| ARPC1A   | 0.0899606812557859  | 0.281 | 0.238 | 6,37E-13 | 0.043                | NO |
| DYNLT1   | -0.0423180485179015 | 0.221 | 0.274 | 1,94E-12 | -0.053               | NO |
| TIMM8B   | -0.0516782180244896 | 0.21  | 0.26  | 3,91E-12 | -0.05                | NO |
| TPM3     | 0.0863781207258174  | 0.273 | 0.231 | 7,07E-13 | 0.042                | NO |
| VAMP8    | -0.0736298240293136 | 0.339 | 0.395 | 1,47E-11 | -0.056               | NO |
| SRSF9    | -0.0946851987126434 | 0.511 | 0.555 | 1,91E-11 | -0.044               | NO |
| C1QBP    | 0.0503352068216635  | 0.522 | 0.464 | 3,25E-11 | 0.058                | NO |
| RAD23B   | -0.0492319285317959 | 0.258 | 0.312 | 5,94E-11 | -0.054               | NO |
| LSM4     | 0.090463617183832   | 0.333 | 0.292 | 6,31E-11 | 0.041                | NO |
| HSPE1    | 0.096161669699097   | 0.65  | 0.609 | 7,03E-11 | 0.041                | NO |
| DDX21    | -0.0564678511260753 | 0.203 | 0.25  | 8,69E-11 | -0.047               | NO |
| XRCC5    | 0.0846113746611445  | 0.287 | 0.246 | 1,30E-10 | 0.041                | NO |
| DNAJA1   | -0.0607355903167808 | 0.303 | 0.358 | 1,50E-10 | -0.055               | NO |
| SLIRP    | -0.0472371087352531 | 0.271 | 0.328 | 1,62E-10 | -0.057               | NO |
| RPS19BP1 | -0.0553766768124789 | 0.213 | 0.259 | 4,61E-10 | -0.046               | NO |
| PHB2     | 0.0845305251792765  | 0.313 | 0.271 | 6,50E-10 | 0.042                | NO |
| NOP10    | 0.112638521938592   | 0.357 | 0.326 | 3,09E-09 | 0.031                | NO |
| NHP2     | 0.0831465982800247  | 0.254 | 0.215 | 7,56E-09 | 0.039                | NO |
| NDUFB10  | 0.0909583449433121  | 0.293 | 0.255 | 5,08E-08 | 0.038                | NO |
| EIF5     | -0.0539780834618246 | 0.289 | 0.342 | 5,10E-08 | -0.053               | NO |
| UBE2N    | -0.0465467768334298 | 0.22  | 0.266 | 7,36E-08 | -0.046               | NO |
| RAC1     | 0.0862532635254307  | 0.533 | 0.502 | 1,76E-07 | 0.031                | NO |
| MRPL14   | -0.0495469409192368 | 0.219 | 0.265 | 2,86E-07 | -0.046               | NO |
| KRT10    | -0.0525864519997662 | 0.237 | 0.284 | 5,47E-07 | -0.047               | NO |
| GNAS     | -0.0781996237736238 | 0.752 | 0.763 | 6,50E-07 | -0.011               | NO |
| RPL4     | 0.10190179747293    | 0.837 | 0.793 | 7,41E-07 | 0.04399999999999999  | NO |
| RPL22L1  | 0.135667856782156   | 0.34  | 0.312 | 1,07E-06 | 0.028                | NO |
| RBX1     | -0.0632552085284465 | 0.445 | 0.5   | 9,49E-06 | -0.055               | NO |
| HSP90AA1 | 0.102181340599428   | 0.823 | 0.772 | 1,40E-05 | 0.05099999999999999  | NO |
| MEST     | 0.0666535491381853  | 0.38  | 0.34  | 1,51E-05 | 0.04                 | NO |

|          |                     |       |       |          |                     |    |
|----------|---------------------|-------|-------|----------|---------------------|----|
| PABPC1   | -0.0403728112251792 | 0.469 | 0.53  | 3,61E-05 | -0.0610000000000001 | NO |
| NEAT1    | -0.0809580313000902 | 0.361 | 0.337 | 7,27E-05 | 0.024               | NO |
| SPCS1    | 0.081221183730673   | 0.31  | 0.275 | 9,20E-05 | 0.035               | NO |
| SNRPF    | 0.0800047968874035  | 0.387 | 0.352 | 1,30E-04 | 0.035               | NO |
| HNRNPA3  | -0.0604657319015766 | 0.361 | 0.413 | 1,68E-04 | -0.052              | NO |
| DDOST    | -0.0498488394076378 | 0.232 | 0.274 | 8,75E-04 | -0.042              | NO |
| PSMD8    | -0.0553173643557596 | 0.323 | 0.37  | 9,19E-03 | -0.047              | NO |
| VDAC2    | 0.0843914738972207  | 0.378 | 0.348 | 2,86E-03 | 0.03                | NO |
| UFC1     | -0.0351568318602031 | 0.243 | 0.287 | 1,11E-02 | -0.044              | NO |
| TUBB     | 0.0889662938580116  | 0.538 | 0.52  | 1,18E-01 | 0.018               | NO |
| RPL35    | 0.0382084808221905  | 0.977 | 0.933 | 2,86E-01 | 0.0439999999999999  | NO |
| BTG1     | 0.156733559110327   | 0.339 | 0.318 | 6,80E-01 | 0.021               | NO |
| PFN1     | 0.0340014754520319  | 0.806 | 0.726 | 1,13E+00 | 0.0800000000000001  | NO |
| HSBP1    | 0.0805900972565243  | 0.357 | 0.329 | 2,93E+00 | 0.028               | NO |
| PPP1CA   | -0.0322851516136504 | 0.237 | 0.278 | 4,84E+00 | -0.041              | NO |
| CLIC3    | -0.0647097399693823 | 0.481 | 0.53  | 9,24E+00 | -0.049              | NO |
| HSPD1    | 0.0526592544343685  | 0.534 | 0.5   | 1,97E+00 | 0.034               | NO |
| VAPA     | -0.0336663147078727 | 0.224 | 0.263 | 4,10E+01 | -0.039              | NO |
| BRK1     | -0.0354353114002899 | 0.233 | 0.271 | 7,08E+01 | -0.038              | NO |
| TRMT112  | -0.0526296172110973 | 0.398 | 0.445 | 8,80E+01 | -0.047              | NO |
| ERH      | -0.0580674127660525 | 0.344 | 0.385 | 9,31E+01 | -0.041              | NO |
| WDR83OS  | 0.0756316312969447  | 0.265 | 0.236 | 9,50E+01 | 0.029               | NO |
| LY6E     | 0.112441211313544   | 0.402 | 0.384 | 1,16E+02 | 0.018               | NO |
| DDT      | 0.0774490380227096  | 0.332 | 0.307 | 8,66E+02 | 0.025               | NO |
| PSMA3    | -0.0390763744710305 | 0.32  | 0.363 | 9,71E+02 | -0.043              | NO |
| SNRPB    | 0.0742938188815245  | 0.402 | 0.377 | 1,27E+03 | 0.025               | NO |
| PSMB1    | -0.0530746580436315 | 0.486 | 0.531 | 3,15E+03 | -0.045              | NO |
| COX20    | -0.0281050065716516 | 0.263 | 0.305 | 3,45E+03 | -0.042              | NO |
| SRP9     | -0.0329431508515268 | 0.246 | 0.284 | 4,68E+03 | -0.038              | NO |
| PTGES3   | 0.0635629220174831  | 0.498 | 0.474 | 4,88E+03 | 0.024               | NO |
| YWHAQ    | 0.0654089334127962  | 0.27  | 0.242 | 5,66E+03 | 0.028               | NO |
| KRT7     | 0.0554960547671508  | 0.659 | 0.617 | 1,19E+04 | 0.042               | NO |
| MRPL27   | -0.0309534237920813 | 0.264 | 0.302 | 2,68E+04 | -0.038              | NO |
| MRPS34   | -0.037667251439533  | 0.239 | 0.274 | 2,83E+04 | -0.035              | NO |
| JTB      | -0.0249466143244033 | 0.244 | 0.282 | 3,96E+04 | -0.038              | NO |
| UBE2L3   | -0.0321869379318804 | 0.284 | 0.323 | 9,60E+04 | -0.039              | NO |
| SRM      | -0.0339187294130707 | 0.248 | 0.284 | 3,89E+04 | -0.036              | NO |
| HMG3     | 0.0806433229160962  | 0.357 | 0.34  | 4,75E+05 | 0.017               | NO |
| EIF3M    | 0.0679379661823183  | 0.278 | 0.254 | 5,58E+05 | 0.024               | NO |
| UQCRB    | 0.0733293996371641  | 0.429 | 0.412 | 6,21E+04 | 0.017               | NO |
| SET      | -0.0631466825271878 | 0.525 | 0.56  | 9,17E+05 | -0.035              | NO |
| OSTC     | -0.0573302112049118 | 0.365 | 0.398 | 1,19E+06 | -0.033              | NO |
| HNRNPF   | 0.0568114212526261  | 0.357 | 0.332 | 3,71E+06 | 0.025               | NO |
| C11orf58 | -0.0226687750094815 | 0.266 | 0.302 | 5,12E+06 | -0.036              | NO |
| APLP2    | 0.0642515122572349  | 0.412 | 0.391 | 6,72E+06 | 0.021               | NO |
| NME1     | 0.0571300387796536  | 0.311 | 0.287 | 2,01E+07 | 0.024               | NO |
| RPS26    | -0.0445847522369269 | 0.745 | 0.757 | 2,09E+07 | -0.012              | NO |
| SUB1     | 0.0634261913206411  | 0.496 | 0.482 | 2,22E+07 | 0.014               | NO |
| CCT4     | -0.0265592879805401 | 0.267 | 0.301 | 2,37E+07 | -0.034              | NO |
| ARPC5    | 0.0513319044417468  | 0.254 | 0.23  | 2,92E+07 | 0.024               | NO |
| COX4I1   | -0.0406307646677728 | 0.604 | 0.647 | 3,56E+07 | -0.043              | NO |
| CYSTM1   | 0.058769070117347   | 0.297 | 0.274 | 6,58E+07 | 0.023               | NO |
| UBB      | 0.0640118460774564  | 0.58  | 0.575 | 1,02E+08 | 0.005               | NO |
| NDUFAB1  | -0.0233710717056157 | 0.31  | 0.347 | 1,19E+08 | -0.037              | NO |
| RSL1D1   | -0.0336818868590458 | 0.292 | 0.325 | 1,47E+08 | -0.033              | NO |

|            |                      |       |       |                      |                        |                     |    |
|------------|----------------------|-------|-------|----------------------|------------------------|---------------------|----|
| PFDN5      | 0.0503058952540825   | 0.636 | 0.625 |                      | 2,23E+08               | 0.011               | NO |
| PSMA4      | -0.0220670022096755  | 0.266 | 0.3   |                      | 2,26E+08               | -0.034              | NO |
| HNRNPA2B1  | -0.0463243217181704  | 0.551 | 0.592 |                      | 2,42E+08               | -0.0409999999999999 | NO |
| FDFT1      | -0.0167582862640093  | 0.238 | 0.27  |                      | 4,31E+08               | -0.032              | NO |
| ANXA1      | -0.0835108659535242  | 0.867 | 0.821 |                      | 5,14E+08               | 0.046               | NO |
| PPP1R14B   | -0.0398097878903858  | 0.475 | 0.515 |                      | 9,76E+07               | -0.04               | NO |
| COX7A2     | 0.0701541568078655   | 0.467 | 0.465 |                      | 6,94E+09               | 0.002               | NO |
| SLC25A3    | 0.0159887912725847   | 0.745 | 0.688 |                      | 8,21E+09               | 0.05700000000000001 | NO |
| EIF2S2     | 0.0675004965759547   | 0.415 | 0.405 | 0.000100341577795026 | 0.00999999999999995    |                     | NO |
| ENY2       | -0.0221077910996777  | 0.239 | 0.267 | 0.000157745956346088 | -0.028                 |                     | NO |
| C12orf57   | -0.0183504319006437  | 0.224 | 0.251 | 0.000219394172005911 | -0.027                 |                     | NO |
| COX6A1     | 0.0505421944470469   | 0.45  | 0.435 | 0.000431806839854661 | 0.015                  |                     | NO |
| UQCR10     | 0.0782121989549688   | 0.54  | 0.55  | 0.000579556570783684 | -0.01                  |                     | NO |
| PRDX4      | 0.0575971147713286   | 0.317 | 0.302 | 0.00103954939234908  | 0.015                  |                     | NO |
| COX5B      | 0.0537520325091916   | 0.472 | 0.463 | 0.00116725220865357  | 0.00899999999999995    |                     | NO |
| MRPS6      | 0.0525442473292469   | 0.255 | 0.238 | 0.00120987874843299  | 0.017                  |                     | NO |
| PRELID1    | -0.0440419492954006  | 0.485 | 0.52  | 0.00139940365961071  | -0.035                 |                     | NO |
| PDCD6      | 0.0497505411354562   | 0.268 | 0.25  | 0.00182025872348789  | 0.018                  |                     | NO |
| NUCKS1     | -0.026332965183373   | 0.251 | 0.277 | 0.0019315661686649   | -0.026                 |                     | NO |
| ZFP36L1    | 0.00734569368715199  | 0.233 | 0.262 | 0.00236496115335523  | -0.029                 |                     | NO |
| DAD1       | -0.0256965091771046  | 0.274 | 0.301 | 0.00268625670849243  | -0.027                 |                     | NO |
| PHB        | 0.0527478595849116   | 0.297 | 0.282 | 0.0029073569689336   | 0.015                  |                     | NO |
| MRPS21     | -0.00786527843302864 | 0.25  | 0.279 | 0.00380995970174516  | -0.029                 |                     | NO |
| NEDD8      | 0.0543683574317203   | 0.445 | 0.436 | 0.00405874052125786  | 0.009000000000000001   |                     | NO |
| IMPDH2     | 0.0583609608342865   | 0.354 | 0.344 | 0.00503868675380429  | 0.01                   |                     | NO |
| CACYBP     | 0.0491246075878563   | 0.307 | 0.292 | 0.00520491336088267  | 0.015                  |                     | NO |
| NCL        | 0.0685652299649804   | 0.543 | 0.55  | 0.0540163375899808   | -0.007000000000000001  |                     | NO |
| PGAM1      | -0.0159927613579891  | 0.434 | 0.47  | 0.0557881851253731   | -0.036                 |                     | NO |
| MRPS12     | 0.0479025473890954   | 0.261 | 0.249 | 0.112819605556954    | 0.012                  |                     | NO |
| LAMTOR5    | -0.0103974788569445  | 0.248 | 0.272 | 0.157387535299295    | -0.024                 |                     | NO |
| CBX3       | -0.0124342735661225  | 0.34  | 0.369 | 0.225603448291319    | -0.029                 |                     | NO |
| MRPL57     | 0.0560555260333856   | 0.296 | 0.287 | 0.274710386400278    | 0.009000000000000001   |                     | NO |
| RBM8A      | -0.0217928326376587  | 0.403 | 0.433 | 0.405332756020938    | -0.03                  |                     | NO |
| EIF3K      | -0.0134483530440226  | 0.406 | 0.44  | 0.422232909150993    | -0.034                 |                     | NO |
| ROMO1      | 0.0583136399848612   | 0.256 | 0.247 | 0.504885317302531    | 0.009000000000000001   |                     | NO |
| FDPS       | 0.0229746793997747   | 0.316 | 0.351 | 0.579904270839981    | -0.035                 |                     | NO |
| C19orf53   | -0.00497291105063713 | 0.303 | 0.33  | 0.613833061333006    | -0.027                 |                     | NO |
| HNRNPAB    | 0.0024389914934142   | 0.252 | 0.277 | 0.827032152352011    | -0.025                 |                     | NO |
| LSM7       | 0.0528806062234519   | 0.405 | 0.403 | 0.917882282591089    | 0.002                  |                     | NO |
| ECH1       | 0.0525806984413902   | 0.265 | 0.257 |                      | 1 0.008000000000000001 |                     | NO |
| UBL5       | -0.002772302963027   | 0.402 | 0.438 |                      | 1 -0.036               |                     | NO |
| LDHB       | 0.0125005818067263   | 0.703 | 0.674 |                      | 1 0.0289999999999999   |                     | NO |
| ACP1       | -0.002366255692691   | 0.253 | 0.275 |                      | 1 -0.022               |                     | NO |
| CLDN4      | 0.0359369202415867   | 0.254 | 0.28  |                      | 1 -0.026               |                     | NO |
| ST13       | -0.0227111839492812  | 0.36  | 0.38  |                      | 1 -0.02                |                     | NO |
| PSMB2      | -0.00698670627497222 | 0.346 | 0.371 |                      | 1 -0.025               |                     | NO |
| VGLL1      | -0.0158443913349071  | 0.426 | 0.448 |                      | 1 -0.022               |                     | NO |
| GADD45GIP1 | -0.00355017751365549 | 0.297 | 0.318 |                      | 1 -0.021               |                     | NO |
| STOML2     | -0.00494257475891358 | 0.254 | 0.27  |                      | 1 -0.016               |                     | NO |
| PARK7      | 0.031786616283011    | 0.443 | 0.443 |                      | 1                      | 0,000               | NO |
| HNRNPM     | 0.0296056781380259   | 0.292 | 0.286 |                      | 1 0.006000000000000001 |                     | NO |
| FKBP1A     | -0.00288269007044961 | 0.34  | 0.361 |                      | 1 -0.021               |                     | NO |
| COTL1      | -0.0172248608754567  | 0.294 | 0.311 |                      | 1 -0.017               |                     | NO |
| SNX3       | 0.00944375293272159  | 0.363 | 0.352 |                      | 1 0.011                |                     | NO |
| ID3        | 0.0403844400087462   | 0.246 | 0.268 |                      | 1 -0.022               |                     | NO |



|          |                      |       |       |   |                     |          |
|----------|----------------------|-------|-------|---|---------------------|----------|
| SAP18    | 0.0344203702622606   | 0.512 | 0.515 | 1 | -0.003              | NO       |
| RTN4     | 0.0629479789435923   | 0.285 | 0.287 | 1 | -0.002              | NO       |
| UBE2I    | -0.00282396162804699 | 0.281 | 0.297 | 1 | -0.016              | NO       |
| POMP     | 0.0480213962335543   | 0.595 | 0.606 | 1 | -0.011              | NO       |
| MYL12B   | -0.00535549503541488 | 0.588 | 0.619 | 1 | -0.031              | NO       |
| SNRPD3   | 0.000278416955791005 | 0.291 | 0.307 | 1 | -0.016              | NO       |
| SRSF7    | -0.00550596340684884 | 0.276 | 0.289 | 1 | -0.013              | NO       |
| TMA7     | 0.0468841625662515   | 0.55  | 0.574 | 1 | -0.0239999999999999 | NO       |
| SF3B6    | 0.0125138014460858   | 0.307 | 0.325 | 1 | -0.018              | NO       |
| FTL      | -0.0126340981248605  | 0.884 | 0.822 | 1 | 0.0620000000000001  | NO       |
| EIF3D    | 0.0103140084442555   | 0.243 | 0.255 | 1 | -0.012              | NO       |
| NDUFA1   | 0.0220347614231979   | 0.296 | 0.316 | 1 | -0.02               | NO       |
| COX8A    | 0.00705964796041592  | 0.439 | 0.464 | 1 | -0.025              | NO       |
| CCT8     | 0.0280363517837051   | 0.31  | 0.311 | 1 | -0.001              | NO       |
| HNRNPR   | 0.0280274515558179   | 0.255 | 0.255 | 1 |                     | 0,000 NO |
| RBM3     | 0.0243060814364441   | 0.307 | 0.308 | 1 | -0.001              | NO       |
| RANBP1   | -0.0171008356904166  | 0.438 | 0.432 | 1 | 0.0060000000000001  | NO       |
| NUPR1    | 0.0809404384447376   | 0.405 | 0.426 | 1 | -0.021              | NO       |
| CCT2     | 0.00307024373276937  | 0.262 | 0.27  | 1 | -0.0080000000000001 | NO       |
| TALDO1   | 0.0139446744000448   | 0.461 | 0.485 | 1 | -0.024              | NO       |
| EIF3H    | 0.0301275314292033   | 0.302 | 0.306 | 1 | -0.004              | NO       |
| DNMT1    | -0.00348243697395129 | 0.278 | 0.273 | 1 | 0.005               | NO       |
| H2AFZ    | -0.0139254023729309  | 0.694 | 0.695 | 1 | -0.001              | NO       |
| SLC25A5  | 0.0363596431862323   | 0.551 | 0.579 | 1 | -0.0279999999999999 | NO       |
| CCNI     | 0.0225322545176771   | 0.263 | 0.265 | 1 | -0.002              | NO       |
| ATP6V0E1 | 0.013852888760541    | 0.344 | 0.357 | 1 | -0.013              | NO       |
| MRPL52   | 0.0308435986497339   | 0.287 | 0.295 | 1 | -0.0080000000000001 | NO       |
| RHOA     | 0.0138273212802087   | 0.425 | 0.434 | 1 | -0.0090000000000001 | NO       |
| NASP     | 0.0231030342261879   | 0.325 | 0.334 | 1 | -0.0090000000000001 | NO       |
| SSR4     | 0.0148819002638464   | 0.396 | 0.407 | 1 | -0.011              | NO       |
| NDUFB2   | 0.0310864133315353   | 0.402 | 0.418 | 1 | -0.016              | NO       |
| H3F3B    | -0.020744617945579   | 0.587 | 0.586 | 1 | 0.001               | NO       |
